# Supplementary material for: Sterol O-Acyltransferase 1 (SOAT1, ACAT) Is a Novel Target of Steroidogenic Factor-1 (SF-1, NR5A1, Ad4BP) in the Human Adrenal
Source: PubMed Central journal article supplement — J Clin Endocrinol Metab. 2011 Jan 14;96(4):E663–8. doi: 10.1210/jc.2010-2021 (PMC3124353; doi:10.1210/jc.2010-2021), 2011-01-14
Supplement: supp_jc.2010-2021_JCEM_10_2021_v2_Suppl_Ferraz_de_Souza.pdf [file supp_jc.2010-2021_JCEM_10_2021_v2_Suppl_Ferraz_de_Souza.pdf]

## Supplemental Methods & Results

### Overview of experimental design for SF-1 overexpression or knockdown

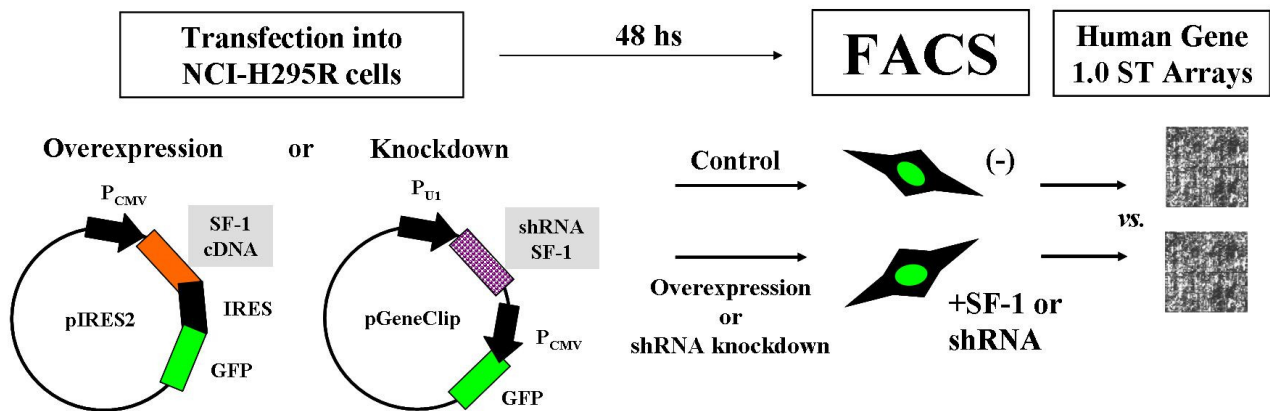

### Patients' characteristics

43 patients with unexplained adrenal insufficiency were studied. Associated features included:

|                                                                                                                                    | <b>46,XY</b><br>(n=40) | <b>46,XX</b><br>(n=3) |
|------------------------------------------------------------------------------------------------------------------------------------|------------------------|-----------------------|
| <b>Gonadal abnormalities</b><br>e.g., micropallus, mild hypospadias, ambiguous genitalia and complete underandrogenization         | 15                     | -                     |
| <b>Cardiac abnormalities</b>                                                                                                       | 2                      | 1                     |
| <b>IUGR</b>                                                                                                                        | 8                      | -                     |
| <b>Skeletal / IMAGE</b><br>IUGR, <u>M</u> etaphyseal Dysplasia, <u>A</u> drenal Hypoplasia Congenita and <u>G</u> enital Anomalies | 3                      | -                     |
| <b>Renal abnormalities</b>                                                                                                         | 2                      | -                     |

Other features: brain abnormalities (1) and short stature (1).

All patients have been previously screened for mutations in *NR5A1* (SF-1) and *NROB1* (DAX1).

### Amplification and sequencing protocol

PCR reactions were performed using MegaMix (Microzone Ltd., Haywards Heath, UK) and 0.5 ul of forward and reverse primers (25 uM, details below) in 20 ul reaction volume, for 35 cycles and with an annealing temperature of 55°C. Amplicons were purified using Microclean (Microzone Ltd.) and then subjected to direct sequencing using dye terminator sequencing kits (BigDye® Terminator v1.1, Applied Biosystems, Warrington, UK) in an automated capillary based sequencer (MegaBACE1000; Amersham Biosciences Inc., Piscataway, NJ). Sequencher version 4.1 (Genecodes Corp., Ann Arbor, MI) was used to analyze the data.

Primers were designed using Primer3Plus (Untergasser et al., Nucleic Acids Res 2007;35:W71-W74) for the entire coding region of *SOAT1* (Ensembl transcript ENST00000367619):

| Exon | Forward primer                   | Reverse primer                    |
|------|----------------------------------|-----------------------------------|
| 2    | 5'-CCATGCGGAAGCTGTGAGAC-3'       | 5'-AAGGACTTATTGTCTAATTGCTTTG-3'   |
| 3    | 5'-TGCACCACAGTTTACGCAGT-3'       | 5'-CAGCAACTGATGAATGGCTTA-3'       |
| 4    | 5'-TGCTTTTACTCCTGCGAACTC-3'      | 5'-ACCAGGGTGTGAACTCAAGC-3'        |
| 5    | 5'-TCCTAGTAGTGAAAAGGTCATTGG-3'   | 5'-CAGATACAGAAGCTCATTACATGTCCA-3' |
| 6    | 5'-TGAGATGTTTTTGGAGAGTGGA-3'     | 5'-CAGGGCAAAGGAATATCACC-3'        |
| 7    | 5'-AAGGTTGAAAGTTTGGTGTGTTGA-3'   | 5'-TGAAAATTTATCCAAGTTAATACAGC-3'  |
| 8    | 5'-TCAGGATTTTCTGACTTTACTGG-3'    | 5'-GGGTGAAATATCCAGCCAAT-3'        |
| 9    | 5'-ATTCCGGAGATCAGGAAAAA-3'       | 5'-CCATTTGAGGCTTCTCAGGT-3'        |
| 10   | 5'-TGTGAGGGTCTTTATTCAAGTTCA-3'   | 5'-TGCATAATGTCAACAGAAAGCAT-3'     |
| 11   | 5'-AAATGGAATACATATGCGAACA-3'     | 5'-TGCAAAGAGAGTCAAGATGG-3'        |
| 12   | 5'-ACAAAATAATCCCAGCTAAATAAAAT-3' | 5'-TTGTGTGAAAGGCTGGTGAC-3'        |
| 13   | 5'-TCTGTCACCAGTGTATGAACCA-3'     | 5'-TGAGCAATTAATATAACTTCTCCAG-3'   |
| 14   | 5'-CAATAGGTGCCTTTGGCATA-3'       | 5'-TCAAAGTCAATATTCTGACCATCTG-3'   |
| 15   | 5'-CGAAGTTCTGACCTCTGATAACTGTA-3' | 5'-CCAAGTCTCACAAACAGAGAATAAAC-3'  |
| 16   | 5'-TGGTGGGAGGCATTTTAGAG-3'       | 5'-GCCTGGAGTGGTCCAATAA-3'         |

### ***Mutational analysis of C2CD2***

Overexpression of SF-1 in NCI-H295R adrenal cells resulted in significant greater than two-fold increase in transcript levels of 108 genes (Supplemental Table 1A). In order to identify which of these target genes were more likely to be involved in human adrenal development and function, we investigated expression patterns using the publicly available expression databases GNF (Su et al., Proc Natl Acad Sci U S A 2002;99:4465-70) and eGenetics (Kelso et al., Genome Res 2003;13:1222-30) through the BioMart portal ([www.biomart.org](http://www.biomart.org)). A subset of 14 genes had documented expression in human fetal and adult adrenal glands according to both databases. Within this subset, C2 calcium-dependent domain containing 2 (*C2CD2*, Entrez Gene ID 25966) emerged as a potentially relevant novel SF-1 target gene since differential expression had also been reported in response to stable SF-1 overexpression in adrenal cells (Doghman et al., Mol Endocrinol 2007; 21:2968-87). *C2CD2*, previously referred to as *C21orf25*, is located at 21q22.3. This gene comprises 14 exons and encodes for a 696-amino acid protein of unknown function, predicted to be involved in Ca<sup>+2</sup>-mediated signaling (C2 domain PFAM identifier PF00168, <http://pfam.sanger.ac.uk>).

Direct sequencing of the entire coding region of *C2CD2* (NM\_015500.1, Ensembl GRCh37 transcript ENST00000380486) was undertaken in the same cohort of 43 patients with adrenal insufficiency of unknown etiology. Primer sequences are available on request.

Two novel non-synonymous coding sequence changes were identified. A heterozygous c.1252A>C (p.418T>P) variant was present in two patients, but analysis of 461 control individuals (Human Random Control British Caucasian DNA Panels 1 to 5; Health Protection Agency Culture Collections, UK) revealed that this substitution was present in 6/922 (0.6%) control alleles. A heterozygous c.1913G>A (p.638R>Q) variant was identified in a patient who presented neo-natally with severe hypospadias and adrenal agenesis. None of 944 British Caucasian control alleles analyzed harbored this variant. However, this change was found in an unaffected parent suggesting that this very rare allelic variant is unlikely to be related to the observed phenotype.

## Supplemental Table 1A

Transcripts differentially expressed following SF-1 overexpression in NCI-H295R adrenal cells

FC, fold change; adj.P-Val, Benjamini-Hochberg-corrected P-value

| Transcript Cluster ID | FC   | adj.P-Val  | Gene Symbol   |
|-----------------------|------|------------|---------------|
| 7972946               | 12.4 | 0.00000751 | RASA3         |
| 7935116               | 12.3 | 0.00000751 | RBP4          |
| 8039353               | 9    | 0.00000978 | TNNI3         |
| 8071642               | 6.36 | 0.00000751 | IGLV6-57      |
| 8095110               | 6.15 | 0.000903   | KIT           |
| 8141737               | 5.35 | 0.0000978  | MYL10         |
| 8114249               | 5.17 | 0.000656   | CXCL14        |
| 8056113               | 4.38 | 0.000128   | CD302         |
| 8056113               | 4.38 | 0.000128   | LY75          |
| 7920285               | 4.29 | 0.000402   | S100A2        |
| 8116653               | 4.06 | 0.000073   | BPHL          |
| 8116649               | 4.06 | 0.000073   | TUBB2A        |
| 8116649               | 4.06 | 0.000073   | TUBB2B        |
| 8036079               | 3.61 | 0.0000974  | DMKN          |
| 7991323               | 3.61 | 0.000329   | PEX11A        |
| 7934993               | 3.56 | 0.000903   | NUDT9P1       |
| 8069508               | 3.53 | 0.0171     | C21orf81      |
| 8069508               | 3.53 | 0.0171     | LOC375010     |
| 8103951               | 3.51 | 0.00121    | ACSL1         |
| 8087691               | 3.51 | 0.000168   | CACNA2D2      |
| 7951662               | 3.41 | 0.000588   | CRYAB         |
| 8066214               | 3.36 | 0.00028    | TGM2          |
| 8158671               | 3.29 | 0.00316    | ASS1          |
| 8104930               | 3.16 | 0.000888   | SLC1A3        |
| 7920278               | 3.14 | 0.00278    | S100A3        |
| 8158995               | 3.03 | 0.0272     | LCN1          |
| 8101828               | 3.03 | 0.00354    | TSPAN5        |
| 8123407               | 3.01 | 0.000244   | MLLT4         |
| 8053741               | 2.97 | 0.000423   | ANKRD20A1     |
| 8053741               | 2.97 | 0.000423   | ANKRD20A2     |
| 8053741               | 2.97 | 0.000423   | ANKRD20A3     |
| 8053741               | 2.97 | 0.000423   | ANKRD20A4     |
| 8053741               | 2.97 | 0.000423   | ANKRD20B      |
| 8080184               | 2.93 | 0.000306   | ALAS1         |
| 8155591               | 2.89 | 0.00255    | CCDC29        |
| 8155591               | 2.89 | 0.00255    | RP11-195B21.3 |
| 8155414               | 2.81 | 0.00455    | LOC100289454  |
| 8160531               | 2.69 | 0.00544    | C9orf72       |
| 8037053               | 2.69 | 0.000959   | CEACAM7       |
| 7942064               | 2.68 | 0.00917    | GAL           |
| 8171653               | 2.66 | 0.000588   | MAP3K15       |
| 8171653               | 2.66 | 0.000588   | PDHA1         |
| 7904408               | 2.6  | 0.00808    | HSD3B2        |
| 8161415               | 2.6  | 0.00598    | LOC100289026  |
| 8123246               | 2.58 | 0.00647    | SLC22A3       |
| 8058238               | 2.53 | 0.00171    | ALS2CR11      |
| 8172043               | 2.53 | 0.000423   | SRPX          |
| 7970381               | 2.5  | 0.00164    | LOC100287836  |
| 7970381               | 2.5  | 0.00164    | LOC643166     |
| 7970381               | 2.5  | 0.00164    | LOC728897     |
| 8033233               | 2.5  | 0.00207    | TUBB4         |
| 7902883               | 2.48 | 0.000631   | LRRC8D        |
| 7990333               | 2.46 | 0.00598    | CYP11A1       |
| 8079588               | 2.46 | 0.0249     | NDUFB1P1      |
| 8022420               | 2.46 | 0.00026    | ZNF519        |
| 7972487               | 2.45 | 0.00115    | DOCK9         |
| 7914342               | 2.43 | 0.00593    | FABP3         |
| 8162652               | 2.41 | 0.00188    | CTSL2         |
| 8097335               | 2.41 | 0.00138    | HSPA4L        |
| 8018038               | 2.39 | 0.00219    | ABCA5         |

|         |      |          |              |
|---------|------|----------|--------------|
| 8080487 | 2.39 | 0.00138  | PRKCD        |
| 8155602 | 2.38 | 0.00133  | ANKRD20A5    |
| 8155602 | 2.38 | 0.00133  | LOC100290156 |
| 7908940 | 2.35 | 0.000888 | ATP2B4       |
| 8164293 | 2.33 | 0.000765 | AK1          |
| 7952526 | 2.33 | 0.000746 | CDON         |
| 7990774 | 2.33 | 0.00138  | RASGRF1      |
| 8155665 | 2.31 | 0.0031   | PGM5         |
| 7970763 | 2.3  | 0.00864  | FLT1         |
| 8169580 | 2.3  | 0.00546  | IL13RA1      |
| 8070538 | 2.27 | 0.000656 | C2CD2        |
| 7930025 | 2.27 | 0.00339  | ELOVL3       |
| 8075838 | 2.27 | 0.0105   | PVALB        |
| 8069505 | 2.23 | 0.00237  | C21orf15     |
| 8041781 | 2.23 | 0.00125  | EPAS1        |
| 7952805 | 2.23 | 0.0108   | LOC283174    |
| 7932584 | 2.23 | 0.00662  | PRTFDC1      |
| 8066590 | 2.22 | 0.0047   | TNNC2        |
| 8040430 | 2.2  | 0.00401  | VSNL1        |
| 7913237 | 2.19 | 0.000888 | CAMK2N1      |
| 8010978 | 2.17 | 0.0124   | LOC100130876 |
| 8039977 | 2.17 | 0.00128  | SNTG2        |
| 7933437 | 2.16 | 0.00532  | PTPN20A      |
| 7933437 | 2.16 | 0.00532  | PTPN20B      |
| 8164967 | 2.16 | 0.00158  | VAV2         |
| 8097435 | 2.14 | 0.0307   | C4orf33      |
| 8054513 | 2.14 | 0.0047   | LOC151009    |
| 8054513 | 2.14 | 0.0047   | LOC440894    |
| 8069565 | 2.08 | 0.00128  | BTG3         |
| 7979269 | 2.07 | 0.00663  | GCH1         |
| 7950883 | 2.07 | 0.0293   | OR7E13P      |
| 7933442 | 2.07 | 0.00788  | PTPN20C      |
| 7905147 | 2.06 | 0.0208   | C1orf54      |
| 8151101 | 2.06 | 0.00439  | MYBL1        |
| 8147548 | 2.06 | 0.00784  | POP1         |
| 7928046 | 2.06 | 0.00092  | TSPAN15      |
| 8164235 | 2.04 | 0.00231  | C9orf117     |
| 7926105 | 2.04 | 0.0031   | GATA3        |
| 8164235 | 2.04 | 0.00231  | PTRH1        |
| 8164235 | 2.04 | 0.00231  | TTC16        |
| 8079407 | 2.03 | 0.00689  | CCR12        |
| 8020339 | 2.03 | 0.00383  | MC5R         |
| 8150253 | 2.03 | 0.00491  | STAR         |
| 8150691 | 2.01 | 0.00948  | EFCAB1       |
| 7976451 | 2.01 | 0.0118   | PPP4R4       |
| 8017843 | 2.01 | 0.0497   | SLC16A6      |
| 8069178 | 2    | 0.00249  | ADARB1       |
| 7974737 | 2    | 0.0272   | LRRC9        |
| 8108873 | 1.99 | 0.00451  | ARHGAP26     |
| 8083415 | 1.98 | 0.00689  | AADAC        |
| 8170513 | 1.97 | 0.00272  | FATE1        |
| 7947270 | 1.97 | 0.0202   | KCNA4        |
| 8023259 | 1.95 | 0.0249   | SNORD58A     |
| 8143054 | 1.94 | 0.00662  | AKR1B1       |
| 8147132 | 1.94 | 0.0416   | CA2          |
| 8174891 | 1.93 | 0.00384  | MIR220A      |
| 8020955 | 1.93 | 0.00128  | MOCOS        |
| 7909586 | 1.93 | 0.0113   | PPP2R5A      |
| 7928308 | 1.92 | 0.00504  | DDIT4        |
| 8019046 | 1.92 | 0.00291  | EIF4A3       |
| 8008237 | 1.92 | 0.0108   | ITGA3        |
| 7905548 | 1.92 | 0.0245   | SPRR3        |
| 8075239 | 1.92 | 0.00228  | THOC5        |

|         |      |         |           |
|---------|------|---------|-----------|
| 7986446 | 1.91 | 0.00788 | ALDH1A3   |
| 7917912 | 1.91 | 0.00188 | DPYD      |
| 8109194 | 1.88 | 0.00575 | SLC26A2   |
| 7985213 | 1.87 | 0.0118  | CHRNA5    |
| 7947599 | 1.87 | 0.00555 | CHST1     |
| 8112649 | 1.87 | 0.00632 | FAM169A   |
| 7934852 | 1.87 | 0.00403 | GLUD1     |
| 7934852 | 1.87 | 0.00403 | GLUD2     |
| 8147439 | 1.87 | 0.00569 | PLEKHF2   |
| 8139118 | 1.87 | 0.0157  | TRGV5P    |
| 8071671 | 1.86 | 0.00558 | GNAZ      |
| 8160637 | 1.84 | 0.00567 | B4GALT1   |
| 7984298 | 1.84 | 0.00751 | DIS3L     |
| 7927363 | 1.84 | 0.00294 | FAM25A    |
| 7927363 | 1.84 | 0.00294 | FAM25B    |
| 7927363 | 1.84 | 0.00294 | FAM25C    |
| 7927363 | 1.84 | 0.00294 | FAM25G    |
| 8021187 | 1.84 | 0.0372  | SKA1      |
| 8020702 | 1.84 | 0.00451 | TAF4B     |
| 8107307 | 1.83 | 0.0204  | CAMK4     |
| 7964997 | 1.83 | 0.0352  | CAPS2     |
| 8068383 | 1.83 | 0.0121  | CLIC6     |
| 7930304 | 1.83 | 0.002   | GSTO1     |
| 8143341 | 1.83 | 0.0108  | JHDM1D    |
| 8044212 | 1.83 | 0.00302 | SULT1C2   |
| 8145954 | 1.83 | 0.00138 | TACC1     |
| 8137709 | 1.83 | 0.0241  | ZFAND2A   |
| 8053744 | 1.82 | 0.00344 | FLJ43315  |
| 7967727 | 1.82 | 0.00662 | GALNT9    |
| 8088285 | 1.82 | 0.0453  | HESX1     |
| 7981750 | 1.82 | 0.00221 | LOC400968 |
| 7981427 | 1.81 | 0.00555 | CKB       |
| 8061013 | 1.81 | 0.00384 | ISM1      |
| 7989146 | 1.81 | 0.0146  | MNS1      |
| 8020814 | 1.81 | 0.0122  | RNF138    |
| 8037079 | 1.8  | 0.00458 | ATPIA3    |
| 8133770 | 1.79 | 0.0066  | CCDC146   |
| 7911096 | 1.79 | 0.0164  | EFCAB2    |
| 8099246 | 1.79 | 0.00378 | GRPEL1    |
| 8164848 | 1.79 | 0.0323  | LCN1L1    |
| 8163535 | 1.78 | 0.0146  | AMBP      |
| 8026971 | 1.78 | 0.0219  | IFI30     |
| 8070557 | 1.78 | 0.00221 | ZNF295    |
| 8166184 | 1.77 | 0.007   | CASB      |
| 8096744 | 1.77 | 0.00234 | CYP2U1    |
| 7905220 | 1.77 | 0.00455 | ECM1      |
| 7919642 | 1.77 | 0.0479  | HIST2H2AB |
| 7912994 | 1.76 | 0.0422  | IFFO2     |
| 8156848 | 1.76 | 0.0242  | NR4A3     |
| 8146717 | 1.75 | 0.0205  | C8orf44   |
| 8164607 | 1.75 | 0.00932 | FNBP1     |
| 8039607 | 1.75 | 0.0045  | PEG3      |
| 8076998 | 1.75 | 0.00576 | PLXNB2    |
| 8146717 | 1.75 | 0.0205  | SGK3      |
| 8144786 | 1.75 | 0.0397  | SLC7A2    |
| 8127987 | 1.75 | 0.0187  | SNORD50A  |
| 8013771 | 1.75 | 0.0465  | TLCD1     |
| 8039607 | 1.75 | 0.0045  | ZIM2      |
| 8086880 | 1.74 | 0.00615 | CDC25A    |
| 8008706 | 1.74 | 0.0232  | DYNLL2    |
| 8107164 | 1.74 | 0.0216  | HISPPD1   |
| 8146649 | 1.74 | 0.0402  | MTFR1     |
| 8084717 | 1.74 | 0.00517 | ST6GAL1   |
| 7959312 | 1.74 | 0.0125  | TMEM120B  |
| 8105456 | 1.73 | 0.00583 | C5orf35   |
| 8041487 | 1.73 | 0.00451 | CCDC75    |
| 8047854 | 1.73 | 0.0183  | CCNYL1    |
| 7993776 | 1.73 | 0.00215 | LOC81691  |
| 7909866 | 1.73 | 0.0117  | MOSC2     |
| 7900540 | 1.73 | 0.0111  | RIMKLA    |
| 7930714 | 1.72 | 0.00244 | ATRNL1    |
| 8044700 | 1.72 | 0.043   | DPP10     |
| 8047127 | 1.72 | 0.0338  | MYO1B     |
| 8112033 | 1.71 | 0.00948 | ARL15     |
| 7939341 | 1.71 | 0.00932 | CD44      |

|         |      |         |              |
|---------|------|---------|--------------|
| 7949916 | 1.71 | 0.00727 | CHKA         |
| 8034315 | 1.71 | 0.0314  | ZNF823       |
| 7940147 | 1.7  | 0.00237 | FAM111B      |
| 7991577 | 1.7  | 0.0498  | LOC440313    |
| 7986214 | 1.7  | 0.00583 | SLCO3A1      |
| 8156706 | 1.7  | 0.017   | TMOD1        |
| 8034379 | 1.7  | 0.0108  | ZNF442       |
| 8101228 | 1.69 | 0.00294 | CNOT6L       |
| 8083272 | 1.69 | 0.00959 | GYG1         |
| 7924888 | 1.69 | 0.0251  | HIST3H2A     |
| 7929388 | 1.69 | 0.00656 | PLCE1        |
| 7909877 | 1.68 | 0.00645 | MOSC1        |
| 7956658 | 1.68 | 0.0157  | SLC16A7      |
| 8046340 | 1.67 | 0.0161  | DYNC112      |
| 7917707 | 1.67 | 0.0491  | EVI5         |
| 8155268 | 1.67 | 0.00588 | POLR1E       |
| 8150138 | 1.67 | 0.0149  | TEX15        |
| 8113577 | 1.67 | 0.0086  | TRIM36       |
| 8035847 | 1.67 | 0.0286  | ZNF675       |
| 8091629 | 1.66 | 0.0309  | C3orf33      |
| 8070730 | 1.66 | 0.0197  | DNMT3L       |
| 8096361 | 1.66 | 0.0246  | HERC5        |
| 8095303 | 1.66 | 0.00821 | LPHN3        |
| 8092177 | 1.66 | 0.00529 | NCEH1        |
| 8127989 | 1.66 | 0.0247  | SNORD50B     |
| 7944667 | 1.66 | 0.0108  | SORL1        |
| 8065089 | 1.65 | 0.0277  | KIF16B       |
| 7936559 | 1.65 | 0.00756 | PDZD8        |
| 7971723 | 1.65 | 0.044   | RP11-327P2.4 |
| 8157144 | 1.64 | 0.00675 | C9orf6       |
| 7916356 | 1.64 | 0.00756 | HSPB11       |
| 8157144 | 1.64 | 0.00675 | IKBKAP       |
| 7914878 | 1.64 | 0.0164  | LOC100289612 |
| 8039545 | 1.64 | 0.0275  | NLRP11       |
| 8173825 | 1.64 | 0.0395  | RPS6KA6      |
| 8019877 | 1.64 | 0.0103  | SMCHD1       |
| 8088106 | 1.64 | 0.00756 | TKT          |
| 8066461 | 1.64 | 0.00662 | TOMM34       |
| 8104234 | 1.64 | 0.0228  | TRIP13       |
| 8080511 | 1.63 | 0.0063  | CACNA1D      |
| 8153939 | 1.63 | 0.0302  | DGAT1        |
| 8044111 | 1.63 | 0.0432  | MRPS9        |
| 8011407 | 1.63 | 0.0379  | TAX1BP3      |
| 7955063 | 1.63 | 0.00576 | TMEM106C     |
| 7928558 | 1.63 | 0.00591 | ZMIZ1        |
| 7970428 | 1.63 | 0.0193  | ZMYM5        |
| 7995976 | 1.62 | 0.00738 | CPNE2        |
| 8006736 | 1.62 | 0.0181  | DUSP14       |
| 8094609 | 1.62 | 0.00854 | FAM114A1     |
| 8133540 | 1.62 | 0.0299  | GATS         |
| 8133540 | 1.62 | 0.0299  | GATSL1       |
| 8133540 | 1.62 | 0.0299  | GATSL2       |
| 8043981 | 1.62 | 0.0314  | ILIR2        |
| 7970577 | 1.62 | 0.0117  | MIPEP        |
| 7985662 | 1.62 | 0.00848 | PDE8A        |
| 8107563 | 1.62 | 0.0244  | PRR16        |
| 8113938 | 1.61 | 0.0235  | ACSL6        |
| 8054702 | 1.61 | 0.0464  | CKAP2L       |
| 8113938 | 1.61 | 0.0235  | LOC728637    |
| 7909529 | 1.61 | 0.0279  | RCOR3        |
| 8078014 | 1.61 | 0.00891 | SLC6A6       |
| 7907702 | 1.61 | 0.0114  | SOAT1        |
| 7951207 | 1.61 | 0.00828 | TMEM123      |
| 8115261 | 1.6  | 0.0222  | CCDC69       |
| 8109528 | 1.6  | 0.0255  | CYFIP2       |
| 7972912 | 1.6  | 0.012   | DCUN1D2      |
| 8071063 | 1.6  | 0.00451 | psiTPE22     |
| 8158998 | 1.6  | 0.00625 | RPL7A        |
| 8158998 | 1.6  | 0.00625 | SNORD36A     |
| 8158998 | 1.6  | 0.00625 | SNORD36C     |
| 8039340 | 1.6  | 0.0372  | TNNT1        |
| 8140752 | 1.59 | 0.0236  | ABCB4        |
| 8058258 | 1.59 | 0.0203  | ALS2CR4      |
| 7974653 | 1.59 | 0.0272  | KIAA0586     |
| 7921882 | 1.59 | 0.0398  | OLFML2B      |

|         |      |         |              |
|---------|------|---------|--------------|
| 8105778 | 1.59 | 0.00654 | PIK3R1       |
| 8147796 | 1.59 | 0.0212  | RIMS2        |
| 8017582 | 1.59 | 0.00893 | TEX2         |
| 8020973 | 1.58 | 0.0193  | FHOD3        |
| 7956271 | 1.58 | 0.0495  | HSD17B6      |
| 8159441 | 1.58 | 0.00593 | PHPT1        |
| 8135734 | 1.57 | 0.0318  | C7orf58      |
| 7924450 | 1.57 | 0.0101  | DUSP10       |
| 8155630 | 1.57 | 0.0464  | LOC100133920 |
| 8155630 | 1.57 | 0.0464  | LOC286297    |
| 8070961 | 1.57 | 0.0101  | LSS          |
| 8155630 | 1.57 | 0.0464  | MTHFD1L      |
| 8111892 | 1.57 | 0.00756 | OXCT1        |
| 7903203 | 1.57 | 0.0246  | SNX7         |
| 7903239 | 1.56 | 0.0145  | AGL          |
| 8155327 | 1.56 | 0.0108  | ALDH1B1      |
| 8034837 | 1.56 | 0.021   | DNAJB1       |
| 8081676 | 1.56 | 0.0337  | GTPBP8       |
| 7929282 | 1.56 | 0.0236  | HHEX         |
| 8050537 | 1.56 | 0.00946 | MATN3        |
| 7933010 | 1.56 | 0.036   | PARD3        |
| 7929132 | 1.56 | 0.0303  | PCGF5        |
| 7933619 | 1.56 | 0.0149  | SGMS1        |
| 8047174 | 1.56 | 0.00985 | SLC39A10     |
| 7943297 | 1.55 | 0.0236  | CEP57        |
| 8068593 | 1.55 | 0.0105  | ETS2         |
| 8057045 | 1.55 | 0.0147  | FKBP7        |
| 8070720 | 1.55 | 0.0449  | ICOSLG       |
| 8043431 | 1.55 | 0.0496  | IGKC         |
| 8043431 | 1.55 | 0.0496  | IGKV1-33     |
| 8043431 | 1.55 | 0.0496  | IGKV1D-33    |
| 8043431 | 1.55 | 0.0496  | LOC100291464 |
| 8043431 | 1.55 | 0.0496  | LOC652694    |
| 8013068 | 1.55 | 0.00948 | PLD6         |
| 8158059 | 1.55 | 0.0372  | STXBP1       |
| 7979611 | 1.55 | 0.0218  | ZBTB25       |
| 7964460 | 1.54 | 0.0118  | DDIT3        |
| 7954185 | 1.54 | 0.0216  | DERA         |
| 8109912 | 1.54 | 0.0269  | KCNIP1       |
| 7960730 | 1.54 | 0.0123  | LPCAT3       |
| 8175256 | 1.54 | 0.0145  | MGC16121     |
| 8126860 | 1.54 | 0.0293  | MUT          |
| 7936050 | 1.53 | 0.0164  | CYP17A1      |
| 8127787 | 1.53 | 0.0221  | IBTK         |
| 7943376 | 1.53 | 0.0487  | KIAA1377     |
| 7981460 | 1.53 | 0.0301  | PPP1R13B     |
| 7991283 | 1.53 | 0.0255  | RHCG         |
| 7929816 | 1.53 | 0.0255  | SCD          |
| 8107920 | 1.53 | 0.00583 | SLC22A5      |
| 8162086 | 1.52 | 0.0285  | AGTPBP1      |
| 8022380 | 1.52 | 0.0221  | CEP76        |
| 8001564 | 1.52 | 0.0194  | DOK4         |
| 7972336 | 1.52 | 0.0264  | DZIP1        |
| 8105121 | 1.52 | 0.0254  | GHR          |
| 8157727 | 1.52 | 0.044   | GPR21        |
| 7958158 | 1.52 | 0.0128  | HCFC2        |
| 7931479 | 1.52 | 0.0213  | INPP5A       |
| 8112331 | 1.52 | 0.0203  | ISCA1        |
| 8112331 | 1.52 | 0.0203  | ISCA1L       |
| 7931728 | 1.52 | 0.0416  | LARP4B       |
| 8034762 | 1.52 | 0.0139  | PRKACA       |
| 7924092 | 1.52 | 0.0106  | SLC30A1      |
| 8052861 | 1.52 | 0.0302  | SNRPG        |
| 7979698 | 1.51 | 0.0146  | ATP6V1D      |
| 8071649 | 1.51 | 0.00738 | BMS1         |
| 8131583 | 1.51 | 0.0173  | BZW2         |
| 7955107 | 1.51 | 0.02    | C12orf68     |
| 7971950 | 1.51 | 0.0335  | DACH1        |
| 7919591 | 1.51 | 0.0241  | FAM72A       |
| 7919591 | 1.51 | 0.0241  | FAM72B       |
| 7919591 | 1.51 | 0.0241  | FAM72C       |
| 7919591 | 1.51 | 0.0241  | FAM72D       |
| 8148448 | 1.51 | 0.025   | KHDRBS3      |
| 8071649 | 1.51 | 0.00738 | LOC96610     |
| 7983228 | 1.51 | 0.015   | MAP1A        |

|         |      |         |             |
|---------|------|---------|-------------|
| 8013908 | 1.51 | 0.0132  | NUFIP2      |
| 7989759 | 1.51 | 0.0289  | PARP16      |
| 8093398 | 1.51 | 0.0276  | PCGF3       |
| 8082314 | 1.51 | 0.02    | PLXNA1      |
| 8066275 | 1.51 | 0.0411  | PRO0628     |
| 8001748 | 1.51 | 0.0286  | SNORA50     |
| 7962358 | 1.51 | 0.0484  | YAF2        |
| 8069131 | 1.5  | 0.0134  | C21orf30    |
| 8114425 | 1.5  | 0.0251  | CDC25C      |
| 8081997 | 1.5  | 0.0246  | FBXO40      |
| 7944769 | 1.5  | 0.0148  | GRAMD1B     |
| 8098985 | 1.5  | 0.0118  | HAUS3       |
| 8042283 | 1.5  | 0.0488  | HSPC159     |
| 8080911 | 1.5  | 0.0338  | KBTBD8      |
| 8103646 | 1.5  | 0.0208  | NEK1        |
| 7903227 | 1.5  | 0.0243  | PALMD       |
| 8098985 | 1.5  | 0.0118  | POLN        |
| 8135323 | 1.5  | 0.0372  | RINT1       |
| 8082797 | 1.5  | 0.042   | TF          |
| 7985134 | 1.49 | 0.0323  | ACSBG1      |
| 8081645 | 1.49 | 0.0291  | C3orf52     |
| 8024566 | 1.49 | 0.0411  | GNA11       |
| 8056837 | 1.49 | 0.0132  | GPR155      |
| 7985134 | 1.49 | 0.0323  | IDH3A       |
| 8060736 | 1.49 | 0.0144  | MIR103-2    |
| 8060736 | 1.49 | 0.0144  | MIR103-2AS  |
| 8033069 | 1.49 | 0.0079  | NDUFA11     |
| 8060736 | 1.49 | 0.0144  | PANK2       |
| 8113881 | 1.49 | 0.0103  | RAPGEF6     |
| 7918622 | 1.49 | 0.0108  | SLC16A1     |
| 7923824 | 1.49 | 0.0284  | SLC41A1     |
| 8093993 | 1.49 | 0.0203  | TADA2B      |
| 7987892 | 1.49 | 0.0305  | ZFP106      |
| 8065032 | 1.48 | 0.00919 | ESF1        |
| 7974166 | 1.48 | 0.0359  | FANCM       |
| 8050719 | 1.48 | 0.00875 | ITSN2       |
| 8164698 | 1.48 | 0.0234  | MED27       |
| 7978628 | 1.48 | 0.0211  | PPP2R3C     |
| 7932420 | 1.48 | 0.0347  | PTPLA       |
| 8169365 | 1.48 | 0.00854 | TMEM164     |
| 8157947 | 1.48 | 0.0193  | ZBTB34      |
| 7942858 | 1.47 | 0.0145  | ANKRD42     |
| 7991581 | 1.47 | 0.0204  | CHSY1       |
| 8144669 | 1.47 | 0.0125  | FDFT1       |
| 8162777 | 1.47 | 0.0168  | GABBR2      |
| 8068866 | 1.47 | 0.0204  | NDUFV3      |
| 8068866 | 1.47 | 0.0204  | PKNOX1      |
| 8069711 | 1.47 | 0.0348  | RNF160      |
| 7914202 | 1.47 | 0.0213  | SNHG12      |
| 8175023 | 1.47 | 0.0126  | ZDHHC9      |
| 7996012 | 1.46 | 0.0124  | ARL2BP      |
| 8147424 | 1.46 | 0.0314  | C8orf38     |
| 8165046 | 1.46 | 0.02    | CAMSAP1     |
| 8172708 | 1.46 | 0.0432  | NUDT11      |
| 7952785 | 1.46 | 0.0182  | OPCML       |
| 8059996 | 1.46 | 0.0142  | PER2        |
| 7944302 | 1.46 | 0.0123  | PHLDB1      |
| 7977003 | 1.46 | 0.0146  | RCOR1       |
| 8066513 | 1.46 | 0.0212  | SDC4        |
| 8172280 | 1.46 | 0.0407  | SLC9A7      |
| 8019842 | 1.46 | 0.0124  | TYMS        |
| 7931168 | 1.45 | 0.0468  | ACADSB      |
| 8164200 | 1.45 | 0.0299  | ANGPTL2     |
| 8044375 | 1.45 | 0.0333  | BCL2L11     |
| 7954132 | 1.45 | 0.0468  | C12orf60    |
| 7969096 | 1.45 | 0.0106  | CDADC1      |
| 8148728 | 1.45 | 0.0158  | CYC1        |
| 8067864 | 1.45 | 0.0151  | hCG_2042718 |
| 7987642 | 1.45 | 0.0162  | NDUFAF1     |
| 8123936 | 1.45 | 0.0348  | NEDD9       |
| 8046804 | 1.45 | 0.0144  | NUP35       |
| 7953218 | 1.45 | 0.031   | RAD51API    |
| 7929116 | 1.45 | 0.0109  | RPP30       |
| 8108099 | 1.45 | 0.0266  | SEC24A      |
| 7915472 | 1.45 | 0.0231  | SLC2A1      |

|         |      |        |           |
|---------|------|--------|-----------|
| 7965769 | 1.45 | 0.0365 | SLC5A8    |
| 8157381 | 1.45 | 0.031  | ZNF618    |
| 8089527 | 1.44 | 0.0224 | ATG3      |
| 8137874 | 1.44 | 0.0442 | CARD11    |
| 7942123 | 1.44 | 0.0425 | CCND1     |
| 8152582 | 1.44 | 0.036  | DSCC1     |
| 7976698 | 1.44 | 0.0213 | EML1      |
| 8010050 | 1.44 | 0.0276 | FAM100B   |
| 8095907 | 1.44 | 0.0133 | FRAS1     |
| 7944603 | 1.44 | 0.0445 | GRIK4     |
| 7960177 | 1.44 | 0.0208 | SLC6A12   |
| 7953508 | 1.44 | 0.0224 | TPII      |
| 8128977 | 1.44 | 0.0393 | TUBE1     |
| 8162940 | 1.43 | 0.0179 | ABCA1     |
| 7973850 | 1.43 | 0.0458 | AKAP6     |
| 8019357 | 1.43 | 0.0397 | DCXR      |
| 7949995 | 1.43 | 0.015  | MRPL21    |
| 8071676 | 1.43 | 0.02   | RAB36     |
| 8130151 | 1.43 | 0.0233 | RAET1E    |
| 8148966 | 1.43 | 0.04   | RPL23AP53 |
| 8094301 | 1.43 | 0.0224 | SLIT2     |
| 8132097 | 1.42 | 0.043  | AQP1      |
| 8168958 | 1.42 | 0.0372 | ARMCX5    |
| 8047265 | 1.42 | 0.0417 | C2orf47   |
| 8047265 | 1.42 | 0.0417 | C2orf60   |
| 8132097 | 1.42 | 0.043  | FAM188B   |
| 8026541 | 1.42 | 0.0229 | FAM32A    |
| 8001764 | 1.42 | 0.0346 | GOT2      |
| 8132097 | 1.42 | 0.043  | INMT      |
| 7978846 | 1.42 | 0.0463 | POLE2     |
| 8008754 | 1.42 | 0.0264 | RAD51C    |
| 8121794 | 1.42 | 0.0262 | SMPDL3A   |
| 7978570 | 1.42 | 0.0176 | SNX6      |
| 8035808 | 1.42 | 0.0318 | ZNF100    |
| 8175076 | 1.42 | 0.0457 | ZNF280C   |
| 7922095 | 1.41 | 0.0193 | BRP44     |
| 7977058 | 1.41 | 0.032  | EIF5      |
| 8018793 | 1.41 | 0.0359 | JMJD6     |
| 8040340 | 1.41 | 0.0302 | LPIN1     |
| 8093086 | 1.41 | 0.0242 | PCYT1A    |
| 8145136 | 1.41 | 0.0311 | PPP3CC    |
| 8081786 | 1.41 | 0.0487 | QTRTD1    |
| 7933999 | 1.41 | 0.0322 | RUFY2     |
| 8061075 | 1.41 | 0.0213 | SNRPB2    |
| 8175039 | 1.4  | 0.0203 | ELF4      |
| 8024485 | 1.4  | 0.0249 | GADD45B   |
| 7963438 | 1.4  | 0.0215 | KRT71     |
| 7954591 | 1.4  | 0.0262 | MRPS35    |
| 7965048 | 1.4  | 0.0382 | NAP1L1    |
| 8001082 | 1.4  | 0.0236 | SLC6A10P  |
| 8001082 | 1.4  | 0.0236 | SLC6A8    |
| 7927981 | 1.4  | 0.0213 | SUPV3L1   |
| 8100231 | 1.4  | 0.0483 | TEC       |
| 8142912 | 1.4  | 0.0359 | TMEM209   |
| 8025998 | 1.4  | 0.0439 | ZNF136    |
| 7974587 | 1.39 | 0.0429 | ACTR10    |
| 7991516 | 1.39 | 0.0325 | ADAMTS17  |
| 7986350 | 1.39 | 0.0419 | ARRDC4    |
| 8097373 | 1.39 | 0.0335 | C4orf29   |
| 8158418 | 1.39 | 0.0483 | C9orf114  |
| 8005661 | 1.39 | 0.0239 | CYT5B     |
| 8158418 | 1.39 | 0.0483 | ENDOG     |
| 8098021 | 1.39 | 0.02   | GRIA2     |
| 7930208 | 1.39 | 0.047  | INA       |
| 7971620 | 1.39 | 0.0213 | KPNA3     |
| 7939767 | 1.39 | 0.0411 | MADD      |
| 8168215 | 1.39 | 0.0323 | MED12     |
| 8072328 | 1.39 | 0.0377 | MTP18     |
| 8113981 | 1.39 | 0.0309 | P4HA2     |
| 8155673 | 1.39 | 0.0462 | PIP5K1B   |
| 8153223 | 1.39 | 0.0278 | PTK2      |
| 8013616 | 1.39 | 0.0262 | SARM1     |
| 8072328 | 1.39 | 0.0377 | SEC14L2   |
| 8013616 | 1.39 | 0.0262 | SLC46A1   |
| 8154059 | 1.39 | 0.0291 | SMARCA2   |

|         |      |        |           |
|---------|------|--------|-----------|
| 7937465 | 1.39 | 0.0398 | TALDO1    |
| 8013616 | 1.39 | 0.0262 | TMEM199   |
| 7903803 | 1.38 | 0.0393 | AHCYL1    |
| 8161829 | 1.38 | 0.0495 | C9orf41   |
| 7972936 | 1.38 | 0.0491 | FAM70B    |
| 7983890 | 1.38 | 0.0329 | GCOM1     |
| 8115410 | 1.38 | 0.0363 | GEMIN5    |
| 7983890 | 1.38 | 0.0329 | GRINL1A   |
| 8045349 | 1.38 | 0.042  | MGAT5     |
| 7973314 | 1.38 | 0.0197 | OXA1L     |
| 8107100 | 1.38 | 0.0215 | RGMB      |
| 8020508 | 1.38 | 0.0372 | RIOK3     |
| 8101366 | 1.38 | 0.0386 | SCD5      |
| 8136039 | 1.37 | 0.0292 | ATP6V1F   |
| 7936706 | 1.37 | 0.0363 | C10orf119 |
| 8006123 | 1.37 | 0.0307 | CPD       |
| 8164535 | 1.37 | 0.0201 | CRAT      |
| 8135114 | 1.37 | 0.0286 | CUX1      |
| 7983350 | 1.37 | 0.0402 | EIF3J     |
| 7948612 | 1.37 | 0.0379 | FADS1     |
| 8096753 | 1.37 | 0.046  | HADH      |
| 8057719 | 1.37 | 0.0317 | HIBCH     |
| 7897561 | 1.37 | 0.0363 | KIF1B     |
| 8037913 | 1.37 | 0.0491 | NAPA      |
| 7932094 | 1.37 | 0.0389 | PHYH      |
| 8060418 | 1.37 | 0.0284 | SIRPA     |
| 8029219 | 1.37 | 0.0356 | TMEM145   |
| 8090772 | 1.37 | 0.0214 | TOPBP1    |
| 8089234 | 1.37 | 0.0236 | ZBTB11    |
| 7930380 | 1.36 | 0.0243 | ADD3      |
| 8152668 | 1.36 | 0.0487 | ATAD2     |
| 7967127 | 1.36 | 0.0349 | CAMKK2    |
| 8098500 | 1.36 | 0.0355 | CDKN2AIP  |
| 8086028 | 1.36 | 0.0424 | GLB1      |
| 7951589 | 1.36 | 0.0456 | LOC120364 |
| 7990620 | 1.36 | 0.0432 | TSPAN3    |
| 7954701 | 1.35 | 0.0483 | C12orf72  |
| 8082846 | 1.35 | 0.037  | EPHB1     |
| 8164343 | 1.35 | 0.0397 | FAM102A   |
| 7957126 | 1.35 | 0.0432 | KCNMB4    |
| 8152764 | 1.35 | 0.0362 | MTSS1     |
| 7900201 | 1.35 | 0.0261 | UTP11L    |
| 8074780 | 1.35 | 0.042  | YPEL1     |
| 8130732 | 1.34 | 0.0406 | BRP44L    |
| 7978923 | 1.34 | 0.0366 | C14orf138 |
| 8074939 | 1.34 | 0.0299 | CHCHD10   |
| 8015835 | 1.34 | 0.0425 | DUSP3     |
| 8138857 | 1.34 | 0.0352 | GGCT      |
| 7931393 | 1.34 | 0.0445 | GLRX3     |
| 8096385 | 1.34 | 0.0495 | HERC3     |
| 8111677 | 1.34 | 0.0397 | LIFR      |
| 8106098 | 1.34 | 0.0416 | MAP1B     |
| 8152597 | 1.34 | 0.0443 | MRPL13    |
| 7939087 | 1.33 | 0.0388 | C11orf46  |
| 7942783 | 1.33 | 0.036  | C11orf67  |
| 7930682 | 1.33 | 0.037  | FAM160B1  |
| 7942783 | 1.33 | 0.036  | INTS4     |
| 8074791 | 1.33 | 0.0319 | MAPK1     |
| 8050591 | 1.33 | 0.0335 | NDUFAF2   |
| 8018652 | 1.33 | 0.0489 | RNF157    |
| 8146550 | 1.33 | 0.0382 | SDCBP     |
| 7912928 | 1.33 | 0.0397 | SDHB      |
| 8061114 | 1.32 | 0.0432 | DSTN      |
| 7992987 | 1.32 | 0.0416 | HMOX2     |
| 8150225 | 1.32 | 0.047  | RAB11FIP1 |
| 7951077 | 1.32 | 0.0474 | SESN3     |
| 7971644 | 1.31 | 0.0401 | C13orf1   |
| 8046408 | 1.31 | 0.0397 | PDK1      |
| 8097570 | 1.31 | 0.0394 | USP38     |
| 7998886 | 1.3  | 0.0488 | PKMYT1    |
| 7934196 | 1.3  | 0.0443 | PSAP      |
| 8157933 | 1.3  | 0.0443 | ZBTB43    |
| 8029437 | -1.3 | 0.0491 | PVR       |
| 7965723 | -1.3 | 0.0447 | PXK       |
| 7965723 | -1.3 | 0.0447 | UHRFBP1L  |

|         |       |        |           |
|---------|-------|--------|-----------|
| 7918749 | -1.31 | 0.0497 | DENND2C   |
| 7990151 | -1.31 | 0.0459 | PKM2      |
| 8079869 | -1.31 | 0.0498 | RBM5      |
| 8079869 | -1.31 | 0.0498 | RBM6      |
| 8102619 | -1.32 | 0.047  | ANXA5     |
| 8154934 | -1.32 | 0.036  | IL11RA    |
| 7923453 | -1.32 | 0.0467 | KDM5B     |
| 7932495 | -1.33 | 0.0438 | C10orf114 |
| 8167234 | -1.33 | 0.0359 | RBM3      |
| 8001373 | -1.33 | 0.0491 | SNX20     |
| 8132245 | -1.34 | 0.047  | FLJ20712  |
| 8171229 | -1.34 | 0.0396 | PNPLA4    |
| 7985695 | -1.35 | 0.0358 | AKAP13    |
| 7919825 | -1.35 | 0.0475 | ARNT      |
| 7935660 | -1.35 | 0.0487 | DNMBP     |
| 8164165 | -1.35 | 0.0327 | HSPA5     |
| 7900228 | -1.35 | 0.0359 | NDUFS5    |
| 8055404 | -1.35 | 0.0422 | UBXN4     |
| 7942342 | -1.36 | 0.0293 | INPL1     |
| 7962000 | -1.36 | 0.0498 | PTHLH     |
| 8039013 | -1.36 | 0.0386 | ZNF321    |
| 7927747 | -1.36 | 0.0328 | ZNF365    |
| 8116983 | -1.37 | 0.0319 | CD83      |
| 7955376 | -1.37 | 0.0427 | DIP2B     |
| 8132860 | -1.37 | 0.0405 | EGFR      |
| 8027521 | -1.37 | 0.0364 | GPATCH1   |
| 7985248 | -1.37 | 0.0342 | KIAA1024  |
| 7906954 | -1.37 | 0.0346 | PBX1      |
| 8074817 | -1.37 | 0.0462 | PI4KA     |
| 8019939 | -1.37 | 0.0329 | TGIF1     |
| 8161701 | -1.37 | 0.0299 | TMEM2     |
| 8074817 | -1.37 | 0.0462 | TOP3B     |
| 8146024 | -1.38 | 0.0363 | ADAM32    |
| 8156610 | -1.38 | 0.0382 | CDC14B    |
| 8156610 | -1.38 | 0.0382 | HABP4     |
| 8142232 | -1.38 | 0.0307 | LAMB4     |
| 8040927 | -1.38 | 0.0249 | NRBP1     |
| 7920725 | -1.38 | 0.0372 | SCAMP3    |
| 8013741 | -1.38 | 0.0272 | SDF2      |
| 8029969 | -1.38 | 0.0327 | SEPW1     |
| 8167185 | -1.38 | 0.0468 | TIMP1     |
| 8136067 | -1.38 | 0.0446 | TSPAN33   |
| 7990054 | -1.38 | 0.0227 | UACA      |
| 8112746 | -1.38 | 0.0229 | WDR41     |
| 7981273 | -1.39 | 0.0416 | CCDC85C   |
| 7933877 | -1.39 | 0.0416 | JMJD1C    |
| 7995806 | -1.39 | 0.0226 | MT1A      |
| 8132387 | -1.39 | 0.0432 | POU6F2    |
| 8166402 | -1.39 | 0.0432 | SMS       |
| 8157216 | -1.39 | 0.0438 | UGCG      |
| 7946635 | -1.39 | 0.0359 | ZBED5     |
| 8131815 | -1.4  | 0.0272 | KLHL7     |
| 7991602 | -1.4  | 0.0255 | PCSK6     |
| 7955078 | -1.4  | 0.0454 | PFKM      |
| 8163402 | -1.4  | 0.047  | ROD1      |
| 7970975 | -1.4  | 0.048  | SOHLH2    |
| 7963713 | -1.41 | 0.0416 | ATP5G2    |
| 8170247 | -1.41 | 0.0396 | CXorf18   |
| 8152491 | -1.41 | 0.0422 | EXT1      |
| 8041995 | -1.41 | 0.0234 | SPTBN1    |
| 8043100 | -1.41 | 0.0254 | TMSB10    |
| 7944803 | -1.41 | 0.0166 | VWA5A     |
| 8056060 | -1.42 | 0.0233 | BAZ2B     |
| 8163599 | -1.42 | 0.0411 | DFNB31    |
| 8044933 | -1.42 | 0.0247 | GLI2      |
| 8077376 | -1.42 | 0.02   | ITPR1     |
| 7995813 | -1.42 | 0.0204 | MT1DP     |
| 8023481 | -1.42 | 0.0243 | NARS      |
| 7961540 | -1.42 | 0.0207 | RERG      |
| 8018558 | -1.43 | 0.0216 | ACOX1     |
| 8122827 | -1.43 | 0.0347 | C6orf97   |
| 8116998 | -1.43 | 0.0247 | JARID2    |
| 8018209 | -1.43 | 0.0259 | NAT9      |
| 7943892 | -1.43 | 0.0496 | NCAM1     |
| 8160857 | -1.43 | 0.0201 | SIGMAR1   |

|         |       |         |           |
|---------|-------|---------|-----------|
| 8096301 | -1.43 | 0.0456  | SPP1      |
| 8020630 | -1.43 | 0.0181  | TTC39C    |
| 8167069 | -1.43 | 0.032   | UBA1      |
| 8100870 | -1.44 | 0.0236  | ADAMTS3   |
| 8177560 | -1.44 | 0.015   | BDP1      |
| 8115543 | -1.44 | 0.0144  | EBF1      |
| 7904303 | -1.44 | 0.0272  | IGSF2     |
| 8122013 | -1.44 | 0.0361  | L3MBTL3   |
| 7984704 | -1.44 | 0.0326  | NEO1      |
| 8150276 | -1.44 | 0.0363  | PPAPDC1B  |
| 8064808 | -1.44 | 0.0286  | SLC23A2   |
| 7962537 | -1.44 | 0.0286  | SLC38A2   |
| 8045933 | -1.44 | 0.0375  | TANK      |
| 8096675 | -1.44 | 0.0211  | TET2      |
| 8174893 | -1.44 | 0.0221  | THOC2     |
| 8122336 | -1.45 | 0.0246  | C6orf115  |
| 8012931 | -1.45 | 0.0318  | CDRT1     |
| 8134699 | -1.45 | 0.0445  | COP56     |
| 8012931 | -1.45 | 0.0318  | FBXW10    |
| 8062041 | -1.46 | 0.0481  | ACSS2     |
| 8081431 | -1.46 | 0.0401  | ALCAM     |
| 7961964 | -1.46 | 0.0126  | C12orf11  |
| 8083223 | -1.46 | 0.0118  | C3orf58   |
| 8047381 | -1.46 | 0.0219  | CFLAR     |
| 7972750 | -1.46 | 0.0145  | COL4A1    |
| 7980680 | -1.46 | 0.0394  | FOXN3     |
| 8106769 | -1.46 | 0.0203  | LOC645181 |
| 8007828 | -1.46 | 0.0216  | MAPT      |
| 7958884 | -1.46 | 0.048   | OAS1      |
| 8104788 | -1.46 | 0.021   | RAI14     |
| 7984364 | -1.46 | 0.0135  | SMAD3     |
| 7927964 | -1.46 | 0.0299  | SRGN      |
| 8121838 | -1.46 | 0.0297  | TPD52L1   |
| 8038792 | -1.47 | 0.0126  | ETFB      |
| 8142194 | -1.47 | 0.0132  | LAMB1     |
| 8139534 | -1.47 | 0.0244  | PKD1L1    |
| 8141688 | -1.47 | 0.0302  | PLOD3     |
| 8016994 | -1.47 | 0.0363  | RNF43     |
| 8109001 | -1.47 | 0.0427  | SPINK5    |
| 8022356 | -1.47 | 0.0227  | SPIRE1    |
| 8056583 | -1.48 | 0.0491  | ABCB11    |
| 8150988 | -1.48 | 0.0222  | ASPH      |
| 8032863 | -1.48 | 0.0215  | C19orf10  |
| 7917885 | -1.48 | 0.0123  | CNN3      |
| 8114920 | -1.48 | 0.0235  | DPYSL3    |
| 8040725 | -1.48 | 0.0432  | DPYSL5    |
| 7986293 | -1.48 | 0.02    | MCTP2     |
| 8107722 | -1.48 | 0.0146  | MEGF10    |
| 8161056 | -1.48 | 0.0146  | TLN1      |
| 7921970 | -1.49 | 0.00819 | ALDH9A1   |
| 8108478 | -1.49 | 0.0236  | C5orf32   |
| 8174527 | -1.49 | 0.0498  | CAPN6     |
| 7969060 | -1.49 | 0.0117  | FNDC3A    |
| 7955873 | -1.49 | 0.0132  | HOXC4     |
| 7955873 | -1.49 | 0.0132  | HOXC5     |
| 7955873 | -1.49 | 0.0132  | HOXC6     |
| 7922268 | -1.49 | 0.0447  | KIFAP3    |
| 7901140 | -1.49 | 0.0352  | MAST2     |
| 7921121 | -1.49 | 0.0324  | MRPL24    |
| 8100298 | -1.49 | 0.0211  | OCLAD2    |
| 7977615 | -1.49 | 0.029   | RNASE1    |
| 8095545 | -1.49 | 0.0098  | RUFY3     |
| 7990632 | -1.49 | 0.0331  | SGK269    |
| 8057056 | -1.49 | 0.0286  | TTN       |
| 8101260 | -1.5  | 0.0139  | ANTXR2    |
| 7904254 | -1.5  | 0.00959 | ATP1A1    |
| 7920737 | -1.5  | 0.0116  | CLK2      |
| 8155096 | -1.5  | 0.00939 | CREB3     |
| 7928354 | -1.5  | 0.0498  | FAM149B1  |
| 7984524 | -1.5  | 0.0359  | PAQR5     |
| 7906564 | -1.5  | 0.0148  | PEA15     |
| 7907611 | -1.5  | 0.02    | RASAL2    |
| 8162264 | -1.51 | 0.0114  | AUH       |
| 7980390 | -1.51 | 0.0249  | C14orf148 |
| 7923596 | -1.51 | 0.0173  | ETNK2     |

|         |       |         |           |
|---------|-------|---------|-----------|
| 8101449 | -1.51 | 0.0128  | HPSE      |
| 7989365 | -1.51 | 0.0354  | RORA      |
| 8113666 | -1.51 | 0.047   | SEMA6A    |
| 8072160 | -1.51 | 0.0171  | ZNRF3     |
| 8069676 | -1.52 | 0.0206  | ADAMTS1   |
| 8171493 | -1.52 | 0.0468  | CTPS2     |
| 7939365 | -1.52 | 0.0133  | FJX1      |
| 7972055 | -1.52 | 0.0171  | KCTD12    |
| 8102232 | -1.52 | 0.0138  | LEF1      |
| 8049530 | -1.52 | 0.031   | LRRFIP1   |
| 8044133 | -1.52 | 0.0123  | NCK2      |
| 8054227 | -1.52 | 0.00848 | REV1      |
| 7944011 | -1.52 | 0.0109  | REXO2     |
| 8103630 | -1.52 | 0.0197  | SH3RF1    |
| 8085486 | -1.52 | 0.0426  | XPC       |
| 7932243 | -1.53 | 0.0151  | FAM171A1  |
| 8027778 | -1.53 | 0.00808 | FXYD5     |
| 7969003 | -1.53 | 0.00959 | ITM2B     |
| 7930533 | -1.53 | 0.0236  | LOC143188 |
| 8087447 | -1.53 | 0.048   | MST1      |
| 8039389 | -1.53 | 0.0299  | PTPRH     |
| 8037505 | -1.53 | 0.0379  | TRAPPC6A  |
| 8008609 | -1.54 | 0.00765 | ANKFN1    |
| 7907370 | -1.54 | 0.0178  | DNM3      |
| 8106354 | -1.54 | 0.00808 | IQGAP2    |
| 7990457 | -1.54 | 0.0439  | MAN2C1    |
| 8047228 | -1.54 | 0.0349  | MOBKL3    |
| 8164077 | -1.54 | 0.00766 | NR5A1     |
| 7979615 | -1.54 | 0.0121  | SPTB      |
| 8073081 | -1.55 | 0.0112  | APOBEC3F  |
| 7951807 | -1.55 | 0.0125  | CADM1     |
| 7916045 | -1.55 | 0.00848 | EPS15     |
| 8015806 | -1.55 | 0.0357  | ETV4      |
| 8089596 | -1.55 | 0.0164  | WDR52     |
| 7907861 | -1.55 | 0.00622 | XPR1      |
| 7927732 | -1.56 | 0.00997 | ARID5B    |
| 8141150 | -1.56 | 0.0115  | ASNS      |
| 8038126 | -1.56 | 0.0416  | CA11      |
| 8170166 | -1.56 | 0.00662 | HTATSF1   |
| 8054281 | -1.56 | 0.011   | LONRF2    |
| 8102800 | -1.56 | 0.0119  | SLC7A11   |
| 7924508 | -1.56 | 0.0225  | SUSD4     |
| 8102904 | -1.56 | 0.00689 | UCP1      |
| 7969204 | -1.56 | 0.037   | WDFY2     |
| 7969438 | -1.57 | 0.0491  | LMO7      |
| 8041383 | -1.57 | 0.011   | LTBP1     |
| 8156043 | -1.57 | 0.0108  | PSAT1     |
| 7897877 | -1.57 | 0.0133  | TNFRSF1B  |
| 8092970 | -1.58 | 0.00756 | APOD      |
| 8102263 | -1.58 | 0.0218  | COL25A1   |
| 8141328 | -1.58 | 0.0229  | CYP3A5    |
| 8141328 | -1.58 | 0.0229  | CYP3A5P2  |
| 7906400 | -1.58 | 0.0118  | IFI16     |
| 8091255 | -1.58 | 0.02    | PAQR9     |
| 7938231 | -1.58 | 0.0338  | PPFIBP2   |
| 8051547 | -1.58 | 0.00662 | PRKD3     |
| 7950743 | -1.58 | 0.0291  | RAB30     |
| 8069744 | -1.58 | 0.00549 | RWDD2B    |
| 8097098 | -1.58 | 0.0112  | USP53     |
| 8056005 | -1.59 | 0.00762 | ACVR1     |
| 7979963 | -1.59 | 0.0318  | DPF3      |
| 8104592 | -1.59 | 0.00435 | FBXL7     |
| 8127109 | -1.59 | 0.00516 | ICK       |
| 7951614 | -1.59 | 0.00587 | PPP2R1B   |
| 8102678 | -1.59 | 0.0106  | TRPC3     |
| 8005638 | -1.6  | 0.00378 | ALDH3A2   |
| 7957759 | -1.6  | 0.0148  | APAF1     |
| 7906900 | -1.6  | 0.0194  | DDR2      |
| 7995776 | -1.6  | 0.00726 | MT3       |
| 7984276 | -1.6  | 0.0101  | SLC24A1   |
| 8023121 | -1.6  | 0.00891 | ST8SIA5   |
| 7922382 | -1.61 | 0.026   | ANKRD45   |
| 8004167 | -1.61 | 0.0242  | FAM64A    |
| 7963187 | -1.61 | 0.0173  | LIMA1     |
| 8055711 | -1.61 | 0.02    | NEB       |

|         |       |         |              |
|---------|-------|---------|--------------|
| 8087935 | -1.61 | 0.00576 | NT5DC2       |
| 7981947 | -1.61 | 0.0419  | SNORD109A    |
| 7981947 | -1.61 | 0.0419  | SNORD109B    |
| 7979824 | -1.62 | 0.0106  | ACTN1        |
| 7909332 | -1.62 | 0.00788 | CD55         |
| 8097753 | -1.62 | 0.042   | DCLK2        |
| 8149835 | -1.62 | 0.0103  | LOC100129717 |
| 8170420 | -1.62 | 0.0128  | MAMLD1       |
| 8106068 | -1.62 | 0.00546 | MCCC2        |
| 8149835 | -1.62 | 0.0103  | NEFL         |
| 7909967 | -1.63 | 0.00509 | CAPN2        |
| 8065758 | -1.63 | 0.0375  | FLJ38773     |
| 8108251 | -1.63 | 0.0101  | NPY6R        |
| 7943760 | -1.63 | 0.00604 | SIK2         |
| 8122464 | -1.63 | 0.0119  | UTRN         |
| 7916862 | -1.64 | 0.00414 | GPR177       |
| 8152280 | -1.64 | 0.00759 | LRP12        |
| 7897953 | -1.64 | 0.0229  | SNORA59A     |
| 7897953 | -1.64 | 0.0229  | SNORA59B     |
| 7897953 | -1.64 | 0.0229  | VPS13D       |
| 8057418 | -1.64 | 0.0347  | ZNF385B      |
| 7962579 | -1.66 | 0.0249  | AMIGO2       |
| 7965686 | -1.66 | 0.0481  | ANKS1B       |
| 7947230 | -1.66 | 0.0279  | BDNF         |
| 8130553 | -1.66 | 0.0427  | FLJ27255     |
| 7957298 | -1.66 | 0.0276  | NAV3         |
| 7962367 | -1.66 | 0.0117  | ZCRB1        |
| 7907601 | -1.67 | 0.0192  | FAM5B        |
| 7982299 | -1.67 | 0.0262  | LOC390561    |
| 8143367 | -1.67 | 0.00403 | SLC37A3      |
| 8131600 | -1.67 | 0.0395  | TSPAN13      |
| 8078397 | -1.68 | 0.0277  | CMTM8        |
| 8121429 | -1.68 | 0.0229  | FIG4         |
| 7904726 | -1.68 | 0.00854 | TXNIP        |
| 7985310 | -1.69 | 0.00782 | FAM108C1     |
| 8166408 | -1.69 | 0.00662 | PHEX         |
| 7979455 | -1.69 | 0.0146  | RTN1         |
| 8081219 | -1.69 | 0.0189  | ST3GAL6      |
| 8134257 | -1.7  | 0.0105  | GNG11        |
| 8134420 | -1.7  | 0.0386  | TAC1         |
| 8005475 | -1.7  | 0.0125  | TRIM16       |
| 8005475 | -1.7  | 0.0125  | TRIM16L      |
| 8017766 | -1.71 | 0.00451 | APOH         |
| 7979959 | -1.71 | 0.00615 | C14orf57     |
| 7956930 | -1.71 | 0.0189  | DYRK2        |
| 7971197 | -1.71 | 0.00917 | ELF1         |
| 8083901 | -1.71 | 0.00371 | FNDC3B       |
| 8130556 | -1.71 | 0.0121  | SOD2         |
| 8174092 | -1.72 | 0.0086  | ARMCX2       |
| 7953603 | -1.72 | 0.0132  | C1S          |
| 8102862 | -1.72 | 0.0098  | MAML3        |
| 8078330 | -1.72 | 0.00662 | RBMS3        |
| 8156060 | -1.72 | 0.00782 | TLE4         |
| 8146000 | -1.73 | 0.0031  | ADAM9        |
| 8120719 | -1.73 | 0.0194  | CD109        |
| 8056222 | -1.73 | 0.0109  | DPP4         |
| 8013319 | -1.73 | 0.0101  | GRAP         |
| 8063437 | -1.73 | 0.00188 | LOC100288461 |
| 7905606 | -1.73 | 0.0132  | NPR1         |
| 8063437 | -1.73 | 0.00188 | TSHZ2        |
| 7966135 | -1.74 | 0.0083  | CORO1C       |
| 8139207 | -1.74 | 0.00355 | INHBA        |
| 8045637 | -1.74 | 0.00673 | KIF5C        |
| 8148049 | -1.74 | 0.00654 | NOV          |
| 8051573 | -1.75 | 0.00491 | CDC42EP3     |
| 7909661 | -1.75 | 0.00357 | RPS6KC1      |
| 7985317 | -1.76 | 0.015   | KIAA1199     |
| 8076403 | -1.76 | 0.00276 | NAGA         |
| 7922756 | -1.76 | 0.0139  | NMNAT2       |
| 8022747 | -1.77 | 0.0269  | B4GALT6      |
| 8061211 | -1.77 | 0.00272 | DTD1         |
| 8154916 | -1.77 | 0.00451 | GALT         |
| 8114900 | -1.77 | 0.0279  | PPP2R2B      |
| 7917052 | -1.77 | 0.0113  | SLC44A5      |
| 8057887 | -1.77 | 0.00433 | STK17B       |



|         |       |          |              |
|---------|-------|----------|--------------|
| 8129458 | -1.78 | 0.00644  | ARHGAP18     |
| 8055465 | -1.78 | 0.00257  | CXCR4        |
| 7950804 | -1.79 | 0.0452   | CCDC89       |
| 8094533 | -1.79 | 0.00505  | FLJ16686     |
| 7903092 | -1.79 | 0.00756  | FNBP1L       |
| 7955963 | -1.79 | 0.023    | MUCL1        |
| 8150537 | -1.79 | 0.0193   | SLC20A2      |
| 8107594 | -1.79 | 0.0117   | SNCAIP       |
| 8130211 | -1.79 | 0.00485  | SYNE1        |
| 8021685 | -1.8  | 0.0135   | CCDC102B     |
| 7925320 | -1.8  | 0.021    | NID1         |
| 8151149 | -1.81 | 0.00403  | ARFGEF1      |
| 7912112 | -1.81 | 0.00561  | DNAJC11      |
| 7912112 | -1.81 | 0.00561  | THAP3        |
| 8101971 | -1.82 | 0.00269  | PPP3CA       |
| 7975482 | -1.82 | 0.00403  | RGS6         |
| 7917516 | -1.83 | 0.033    | GBP1         |
| 7917516 | -1.83 | 0.033    | GBP3         |
| 8151816 | -1.83 | 0.0314   | GEM          |
| 7918902 | -1.84 | 0.00166  | CD58         |
| 7943867 | -1.85 | 0.0162   | BCO2         |
| 8089464 | -1.85 | 0.0207   | LOC151760    |
| 8173551 | -1.85 | 0.00239  | PHKA1        |
| 7983527 | -1.85 | 0.00237  | SEMA6D       |
| 8102415 | -1.86 | 0.0179   | CAMK2D       |
| 8103415 | -1.87 | 0.0142   | C4orf18      |
| 8162531 | -1.88 | 0.00237  | MT1G         |
| 8162531 | -1.88 | 0.00237  | MT1P1        |
| 8162531 | -1.88 | 0.00237  | MT1X         |
| 8106019 | -1.88 | 0.0103   | PMCHL1       |
| 8106019 | -1.88 | 0.0103   | PMCHL2       |
| 8092726 | -1.89 | 0.00552  | CLDN1        |
| 8056457 | -1.89 | 0.0122   | SCN1A        |
| 8004545 | -1.9  | 0.00442  | ATP1B2       |
| 8142585 | -1.9  | 0.00172  | CADPS2       |
| 8117054 | -1.9  | 0.00168  | CAP2         |
| 8051066 | -1.9  | 0.0216   | MPV17        |
| 7909681 | -1.9  | 0.0156   | PROX1        |
| 8122634 | -1.9  | 0.00485  | SAMD5        |
| 8083246 | -1.91 | 0.00234  | CPB1         |
| 8117243 | -1.91 | 0.00517  | LRRC16A      |
| 8167965 | -1.91 | 0.00152  | MSN          |
| 7971150 | -1.92 | 0.0127   | LHFP         |
| 8095362 | -1.92 | 0.00344  | MT2A         |
| 7947165 | -1.92 | 0.0098   | SLC5A12      |
| 8102523 | -1.93 | 0.002    | FABP2        |
| 8098204 | -1.94 | 0.00624  | CPE          |
| 7917347 | -1.94 | 0.00228  | DDAH1        |
| 8169145 | -1.94 | 0.0227   | MUM1L1       |
| 8107133 | -1.94 | 0.00228  | PAM          |
| 8168875 | -1.95 | 0.0086   | ARMCX3       |
| 8029988 | -1.95 | 0.00177  | ELSPBP1      |
| 8127072 | -1.95 | 0.0021   | GSTA1        |
| 7983564 | -1.95 | 0.00544  | SLC12A1      |
| 8148304 | -1.95 | 0.0029   | TRIB1        |
| 7984517 | -1.96 | 0.00125  | GLCE         |
| 7925511 | -1.96 | 0.0359   | PLD5         |
| 8059279 | -1.98 | 0.00245  | EPHA4        |
| 8168472 | -2    | 0.00414  | ATP7A        |
| 8089082 | -2    | 0.00116  | DCBLD2       |
| 8121749 | -2    | 0.000909 | GJA1         |
| 8122807 | -2.01 | 0.00351  | AKAP12       |
| 8055911 | -2.01 | 0.00587  | LOC100129449 |
| 8072735 | -2.03 | 0.00326  | APOL1        |
| 8174937 | -2.03 | 0.000888 | ODZ1         |
| 7907893 | -2.04 | 0.000959 | MR1          |
| 8002303 | -2.04 | 0.00588  | NQO1         |
| 8102792 | -2.04 | 0.00689  | PCDH18       |
| 7951351 | -2.04 | 0.00159  | PDGFD        |
| 8060854 | -2.04 | 0.00219  | PLCB1        |
| 8009301 | -2.04 | 0.0128   | PRKCA        |
| 7932254 | -2.06 | 0.00403  | ITGA8        |
| 8046646 | -2.06 | 0.00171  | OSBPL6       |
| 7962559 | -2.06 | 0.00689  | SLC38A4      |
| 7974080 | -2.07 | 0.00149  | MIA2         |

|         |       |          |             |
|---------|-------|----------|-------------|
| 8092959 | -2.07 | 0.00174  | PPP1R2      |
| 8112865 | -2.07 | 0.00354  | SERINC5     |
| 8145611 | -2.08 | 0.0327   | FZD3        |
| 8099524 | -2.08 | 0.0132   | LDB2        |
| 7932765 | -2.08 | 0.00629  | MPP7        |
| 8021635 | -2.08 | 0.0108   | SERPINB10   |
| 8021635 | -2.08 | 0.0108   | SERPINB2    |
| 7968872 | -2.1  | 0.0236   | DNAJC15     |
| 7968015 | -2.1  | 0.0118   | TNFRSF19    |
| 7984569 | -2.11 | 0.00225  | LRRC49      |
| 7912157 | -2.13 | 0.00171  | ERRF1       |
| 8128956 | -2.13 | 0.00284  | FYN         |
| 8092707 | -2.13 | 0.000888 | LEPREL1     |
| 8147516 | -2.13 | 0.00504  | MATN2       |
| 7910611 | -2.14 | 0.00125  | KCNK1       |
| 8148040 | -2.14 | 0.0121   | MAL2        |
| 8088247 | -2.16 | 0.00155  | ARHGEF3     |
| 7995525 | -2.16 | 0.00181  | NKD1        |
| 8109490 | -2.16 | 0.00283  | SGCD        |
| 7961083 | -2.17 | 0.00125  | CLEC2B      |
| 8104901 | -2.17 | 0.00662  | IL7R        |
| 8161044 | -2.17 | 0.00493  | TPM2        |
| 7962312 | -2.19 | 0.00919  | ABCD2       |
| 8103206 | -2.19 | 0.00126  | FBXW7       |
| 7968417 | -2.19 | 0.0018   | FRY         |
| 8156923 | -2.19 | 0.000888 | RP11-35N6.1 |
| 8088560 | -2.2  | 0.00355  | ADAMTS9     |
| 7942503 | -2.2  | 0.000631 | PPME1       |
| 8101952 | -2.22 | 0.00155  | DDIT4L      |
| 7925876 | -2.22 | 0.001    | PFKP        |
| 8149825 | -2.22 | 0.00932  | STC1        |
| 8063115 | -2.23 | 0.00383  | MMP9        |
| 7979044 | -2.23 | 0.000645 | NIN         |
| 8046124 | -2.25 | 0.00451  | DHRS9       |
| 8176133 | -2.27 | 0.000694 | G6PD        |
| 7995843 | -2.27 | 0.000888 | NUP93       |
| 7961269 | -2.27 | 0.00188  | PRB4        |
| 7961269 | -2.27 | 0.00188  | PRH1        |
| 8037283 | -2.27 | 0.00788  | PSG1        |
| 8037283 | -2.27 | 0.00788  | PSG4        |
| 8116921 | -2.28 | 0.00238  | EDN1        |
| 8135218 | -2.3  | 0.0157   | LRRC17      |
| 7960947 | -2.33 | 0.000903 | A2M         |
| 8155849 | -2.33 | 0.00614  | ANXA1       |
| 8174239 | -2.33 | 0.00239  | BEX2        |
| 8149629 | -2.33 | 0.000631 | GFRA2       |
| 8119052 | -2.33 | 0.000588 | PNPLA1      |
| 8060895 | -2.33 | 0.0367   | RNU105B     |
| 8101762 | -2.36 | 0.00635  | SNCA        |
| 8045736 | -2.38 | 0.000311 | FMNL2       |
| 8166784 | -2.38 | 0.00715  | TSPAN7      |
| 7930194 | -2.39 | 0.000519 | CNNM2       |
| 8179819 | -2.39 | 0.000888 | DDAH2       |
| 7963986 | -2.39 | 0.000816 | RAB13       |
| 8100827 | -2.43 | 0.0108   | IGJ         |
| 7904361 | -2.45 | 0.000888 | FAM46C      |
| 8089329 | -2.45 | 0.0014   | MYH15       |
| 7977933 | -2.45 | 0.00148  | SLC7A8      |
| 7961142 | -2.5  | 0.0115   | OLR1        |
| 7979204 | -2.51 | 0.000781 | FERMT2      |
| 7974090 | -2.53 | 0.00244  | CTAGE5      |
| 8131666 | -2.53 | 0.00108  | ITGB8       |
| 7950764 | -2.55 | 0.00504  | DLG2        |
| 7958253 | -2.66 | 0.000888 | C12orf75    |
| 8129573 | -2.68 | 0.00221  | MOXD1       |
| 8138289 | -2.69 | 0.000888 | ETV1        |
| 7962375 | -2.69 | 0.00115  | PRICKLE1    |
| 7905544 | -2.73 | 0.00738  | SPRR1A      |
| 7935058 | -2.77 | 0.000442 | MYOF        |
| 7954559 | -2.81 | 0.00163  | PPFIBP1     |
| 7917954 | -2.87 | 0.0049   | FRRS1       |
| 8112220 | -2.87 | 0.000631 | PDE4D       |
| 8105302 | -2.89 | 0.00645  | FST         |
| 7933872 | -2.91 | 0.00026  | EGR2        |
| 8175492 | -2.93 | 0.000378 | ATP11C      |

|         |       |           |          |
|---------|-------|-----------|----------|
| 7961320 | -3.07 | 0.000253  | PRB3     |
| 8122222 | -3.1  | 0.000307  | PDE7B    |
| 7961306 | -3.1  | 0.000222  | PRB1     |
| 7961306 | -3.1  | 0.000222  | PRB2     |
| 8154491 | -3.12 | 0.000253  | ADAMTSL1 |
| 8037949 | -3.12 | 0.00138   | SULT2A1  |
| 7902687 | -3.14 | 0.000904  | CYR61    |
| 8088192 | -3.14 | 0.000311  | ERC2     |
| 8171624 | -3.16 | 0.00587   | GPR64    |
| 7957140 | -3.16 | 0.000888  | LGR5     |
| 7956009 | -3.16 | 0.000128  | METTL7B  |
| 7922474 | -3.27 | 0.000631  | KIAA0040 |
| 8089011 | -3.34 | 0.000247  | PROS1    |
| 8168622 | -3.39 | 0.00237   | KLHL4    |
| 7926545 | -3.48 | 0.000247  | PLXDC2   |
| 8171297 | -3.56 | 0.000311  | MID1     |
| 7956759 | -3.56 | 0.000222  | SRGAP1   |
| 7910022 | -3.61 | 0.00493   | CNIH3    |
| 8056257 | -3.61 | 0.000888  | FAP      |
| 7965322 | -3.63 | 0.00205   | KITLG    |
| 7964834 | -3.84 | 0.000413  | CPM      |
| 8161884 | -3.92 | 0.000903  | PRUNE2   |
| 7920123 | -3.92 | 0.00738   | S100A10  |
| 8121712 | -3.94 | 0.000073  | SLC35F1  |
| 8122660 | -3.97 | 0.000247  | UST      |
| 8055688 | -4.17 | 0.00112   | RND3     |
| 7957966 | -4.2  | 0.00387   | MYBPC1   |
| 7957570 | -4.32 | 0.000222  | PLXNC1   |
| 8105040 | -4.44 | 0.000073  | OSMR     |
| 8077270 | -4.5  | 0.000631  | CHL1     |
| 8092134 | -4.53 | 0.000247  | PLD1     |
| 8163637 | -5.54 | 0.0000325 | TNC      |
| 7909789 | -5.82 | 0.0000265 | TGFB2    |
| 8166593 | -5.86 | 0.000128  | IL1RAPL1 |
| 8091243 | -7.36 | 0.0000265 | PCOLCE2  |

## Supplemental Table 1B

Functional annotation enrichment analysis of transcripts differentially expressed following SF-1 overexpression in NCI-H295R adrenal cells (fold change >1.5 or <-1.5 only; key results are shown)

|                                                    | Category                                           | Term                                             | P-value                      | Genes                                                                                                                                                                                                                       |
|----------------------------------------------------|----------------------------------------------------|--------------------------------------------------|------------------------------|-----------------------------------------------------------------------------------------------------------------------------------------------------------------------------------------------------------------------------|
| Transcript levels increased by SF-1 overexpression | SP_PIR_KEYWORDS                                    | Steroidogenesis                                  | 0.0006                       | HSD3B2, CYP17A1, CYP11A1, STAR                                                                                                                                                                                              |
|                                                    | GOTERM_BP_FAT                                      | Regulation of system process                     | 0.0020                       | TF, FLT1, TNNC2, EPAS1, STAR, STXBP1, KIT, TNNI3, PLCE1, TNNT1, SLC1A3, RASGRF1, PRKACA, SLC22A5                                                                                                                            |
|                                                    | GOTERM_BP_FAT                                      | Cellular hormone metabolic process               | 0.0029                       | RBP4, CYP17A1, CYP11A1, STAR, ALDH1A3, HSD17B6                                                                                                                                                                              |
|                                                    | GOTERM_BP_FAT                                      | Lipid biosynthetic process                       | 0.0030                       | HSD3B2, CHKA, CYP11A1, STAR, SCD, LSS, SGMS1, LPCAT3, PLCE1, CYP17A1, DGAT1, ELOVL3, FABP3, HSD17B6                                                                                                                         |
|                                                    | GOTERM_BP_FAT                                      | Glutamine family amino acid biosynthetic process | 0.0036                       | SLC1A3, ASS1, GLUD2, GLUD1                                                                                                                                                                                                  |
|                                                    | SP_PIR_KEYWORDS                                    | Microtubule                                      | 0.0046                       | HAUS3, CEP57, TUBB2B, TUBB2A, DYNLL2, MAP1A, KIF16B, SKA1, PTPN20B, DYNC1I2, PTPN20A, TUBB4                                                                                                                                 |
|                                                    | SP_PIR_KEYWORDS                                    | Transit peptide                                  | 0.0050                       | GRPEL1, CYP11A1, STAR, GLUD2, GLUD1, CA5B, MOSC2, MOSC1, MIPEP, MTHFD1L, ISCA1, MUT, ALAS1, MRPS9, ALDH1B1, OXCT1, PDHA1                                                                                                    |
|                                                    | GOTERM_MF_FAT                                      | Molybdenum ion binding                           | 0.0060                       | MOCOS, MOSC2, MOSC1                                                                                                                                                                                                         |
|                                                    | GOTERM_BP_FAT                                      | Response to drug                                 | 0.0102                       | SLC1A3, ACSL1, STAR, ALDH1A3, ATP1A3, FABP3, SLC22A5, GAL, DDIT3, ABCB4                                                                                                                                                     |
|                                                    | GOTERM_BP_FAT                                      | Folic acid and derivative biosynthetic process   | 0.0113                       | LOC286297, MTHFD1L, GCH1                                                                                                                                                                                                    |
|                                                    | GOTERM_BP_FAT                                      | Regulation of hormone levels                     | 0.0132                       | RBP4, CYP17A1, DGAT1, CYP11A1, STAR, ALDH1A3, HSD17B6, GAL                                                                                                                                                                  |
|                                                    | GOTERM_BP_FAT                                      | Steroid biosynthetic process                     | 0.0136                       | HSD3B2, CYP17A1, CYP11A1, STAR, HSD17B6, LSS                                                                                                                                                                                |
|                                                    | SP_PIR_KEYWORDS                                    | Cholesterol metabolism                           | 0.0148                       | SOAT1, MUT, CYP11A1, SORL1                                                                                                                                                                                                  |
|                                                    | Transcript levels decreased by SF-1 overexpression | GOTERM_MF_FAT                                    | Cytoskeletal protein binding | 0.0001                                                                                                                                                                                                                      |
| GOTERM_MF_FAT                                      |                                                    | Actin binding                                    | 0.0001                       | FMNL2, LIMA1, CAP2, MYH15, MYBPC1, UTRN, IQGAP2, LMO7, ACTN1, FXYD5, KLHL4, TPM2, CORO1C, SYNE1, NEB, CXCR4, MSN, SPTB                                                                                                      |
| GOTERM_BP_FAT                                      |                                                    | Regulation of apoptosis                          | 0.0002                       | SH3RF1, CADM1, MMP9, SNCA, STK17B, ASNS, ITM2B, TGFB2, PRUNE2, PEA15, BDNF, APOH, TNFRSF19, DYRK2, DDAH2, NQO1, NEFL, ADAM9, PRKCA, TXNIP, ARHGEF3, ANXA1, ACTN1, IFI16, SOD2, ATP7A, INHBA, AMIGO2, SERPINB2, APAF1, ACVR1 |
| GOTERM_BP_FAT                                      |                                                    | Catecholamine metabolic process                  | 0.0004                       | ATP7A, SNCAIP, SNCA, NPR1, MOXD1, TGFB2                                                                                                                                                                                     |
| GOTERM_BP_FAT                                      |                                                    | Ion homeostasis                                  | 0.0006                       | PRKCA, SCN1A, EGR2, SNCA, EDN1, SLC7A8, TAC1, NPR1, SOD2, ATP7A, CD55, SERINC5, CXCR4, MT2A, CLDN1, CAMK2D, STC1, PPP3CA, MT3                                                                                               |
| GOTERM_BP_FAT                                      |                                                    | Regulation of locomotion                         | 0.0009                       | PRKCA, PLD1, CREB3, CXCR4, MMP9, SNCA, EDN1, APOH, TAC1, ADAM9, TRIB1, TGFB2                                                                                                                                                |
| GOTERM_BP_FAT                                      |                                                    | Response to toxin                                | 0.0009                       | PRKCA, ATP7A, SLC7A8, TRIM16, NQO1, NEFL, SLC7A11                                                                                                                                                                           |
| GOTERM_BP_FAT                                      |                                                    | Positive regulation of secretion                 | 0.0009                       | PRKCA, INHBA, CADM1, SNCA, EDN1, TAC1, TRIM16, ADAM9, TGFB2                                                                                                                                                                 |
| SP_PIR_KEYWORDS                                    |                                                    | Metal-thiolate cluster                           | 0.0009                       | MT2A, MT1G, MT1X, MT3                                                                                                                                                                                                       |
| GOTERM_MF_FAT                                      |                                                    | Cytokine binding                                 | 0.0010                       | A2M, TNFRSF1B, CXCR4, OSMR, TNFRSF19, TRIM16, IL7R, GFRA2, ACVR1                                                                                                                                                            |

Functional annotation enrichment analysis was performed using the Database for Annotation, Visualization and Integrated Discovery (DAVID) v6.7 (<http://david.abcc.ncifcrf.gov/>) (Huang et al., Nat Protoc 2009;4:44-57 & Dennis et al., Genome Biol 2003;4:P3). P-values correspond to the EASE score, a modified Fisher's exact test to measure significance of gene enrichment in annotation terms. SP\_PIR, Protein Information Resource; GOTERM\_XX\_FAT, Gene Ontology database term set curated by DAVID; BP, biological process; MF, molecular function.

## Supplemental Table 2

Transcripts differentially expressed following SF-1 knockdown with shRNA in NCI-H295R adrenal cells

FC, fold change; adj.P-Val, Benjamini-Hochberg-corrected P-value

| Transcript Cluster ID | FC    | adj.P-Val | Gene Symbol |
|-----------------------|-------|-----------|-------------|
| 7907601               | -1.76 | 0.00165   | FAM5B       |
| 8128043               | -1.67 | 0.0218    | CNR1        |
| 7924342               | -1.51 | 0.00251   | SLC30A10    |
| 8150253               | -1.49 | 0.0197    | STAR        |
| 7903358               | -1.44 | 0.0357    | VCAM1       |
| 8129573               | -1.41 | 0.0494    | MOXD1       |
| 8078619               | -1.4  | 0.0146    | ITGA9       |
| 8040430               | -1.37 | 0.0197    | VSNL1       |
| 7990333               | -1.36 | 0.0264    | CYP11A1     |
| 7907702               | -1.35 | 0.047     | SOAT1       |
| 8170671               | -1.34 | 0.0357    | ATP2B3      |
| 7967544               | -1.31 | 0.0205    | SCARB1      |
| 7991602               | -1.3  | 0.0157    | PCSK6       |
| 8114030               | -1.3  | 0.0198    | KIF3A       |
| 8139921               | -1.3  | 0.00837   | CALN1       |
| 8148049               | -1.29 | 0.0148    | NOV         |
| 8039607               | -1.28 | 0.0121    | ZIM2        |
| 8039607               | -1.28 | 0.0121    | PEG3        |
| 8161919               | -1.28 | 0.0148    | TLE1        |
| 8044391               | -1.27 | 0.0437    | MERTK       |
| 8152764               | -1.25 | 0.0264    | MTSS1       |
| 8100714               | -1.2  | 0.0357    | YTHDC1      |
| 8114050               | -1.2  | 0.0264    | SEPT8       |
| 8095870               | 1.2   | 0.0327    | CCNG2       |
| 8162610               | 1.2   | 0.0357    | CDC14B      |
| 7901720               | 1.23  | 0.0357    | PRKAA2      |
| 7945245               | 1.23  | 0.0418    | NTM         |
| 7972487               | 1.24  | 0.0392    | DOCK9       |
| 8106820               | 1.24  | 0.0214    | POLR3G      |
| 7968015               | 1.25  | 0.0405    | TNFRSF19    |
| 8168472               | 1.25  | 0.0317    | ATP7A       |
| 7970569               | 1.26  | 0.0494    | SACS        |
| 8161701               | 1.26  | 0.0454    | TMEM2       |
| 8090433               | 1.27  | 0.0361    | MGLL        |
| 8102249               | 1.27  | 0.0357    | AGXT2L1     |
| 7902965               | 1.28  | 0.0454    | BTBD8       |
| 8058091               | 1.28  | 0.0361    | SATB2       |
| 8156610               | 1.28  | 0.0218    | HABP4       |
| 8156610               | 1.28  | 0.0218    | CDC14B      |
| 7952309               | 1.29  | 0.0437    | BLID        |
| 8102800               | 1.29  | 0.0124    | SLC7A11     |
| 8081810               | 1.3   | 0.022     | GAP43       |

|         |      |          |                 |
|---------|------|----------|-----------------|
| 8155849 | 1.3  | 0.0258   | ANXA1           |
| 7943760 | 1.31 | 0.0437   | SIK2            |
| 7983527 | 1.32 | 0.0264   | SEMA6D          |
| 8067055 | 1.33 | 0.0176   | ATP9A           |
| 8083779 | 1.34 | 0.0357   | SERPINI1        |
| 8166593 | 1.37 | 0.0218   | IL1RAPL1        |
| 8094789 | 1.38 | 0.0184   | LIMCH1          |
| 7924309 | 1.39 | 0.00248  | ESRRG           |
| 8129482 | 1.39 | 0.0168   | SAMD3           |
| 8162533 | 1.39 | 0.00837  | PTCH1           |
| 8088919 | 1.4  | 0.0176   | ROBO1           |
| 8111998 | 1.41 | 0.0148   | HCN1            |
| 8135774 | 1.41 | 0.0146   | PTPRZ1          |
| 8063458 | 1.42 | 0.0157   | DOK5            |
| 7962000 | 1.43 | 0.0361   | PTHLH           |
| 7922343 | 1.44 | 0.0148   | TNFSF4          |
| 7917503 | 1.45 | 0.0148   | GBP3            |
| 7954926 | 1.45 | 0.0197   | PDZRN4          |
| 8157153 | 1.46 | 0.0197   | AKAP2           |
| 8157153 | 1.46 | 0.0197   | PALM2-<br>AKAP2 |
| 8157153 | 1.46 | 0.0197   | PALM2           |
| 8085914 | 1.47 | 0.0418   | SLC4A7          |
| 8104746 | 1.47 | 0.00165  | NPR3            |
| 8163637 | 1.47 | 0.0176   | TNC             |
| 8046380 | 1.48 | 0.0148   | ITGA6           |
| 8150529 | 1.5  | 0.0148   | DKK4            |
| 8122807 | 1.52 | 0.0357   | AKAP12          |
| 8095736 | 1.53 | 0.00837  | AREG            |
| 8104758 | 1.53 | 0.0357   | C5orf23         |
| 7909789 | 1.54 | 0.00837  | TGFB2           |
| 7901993 | 1.55 | 0.00625  | CACHD1          |
| 8106098 | 1.57 | 0.00165  | MAP1B           |
| 8028737 | 1.58 | 0.0197   | LGALS13         |
| 8142718 | 1.58 | 0.00165  | GRM8            |
| 7927631 | 1.59 | 0.00837  | DKK1            |
| 8102415 | 1.6  | 0.00748  | CAMK2D          |
| 8015133 | 1.65 | 0.00625  | KRT23           |
| 8095744 | 1.78 | 0.00251  | AREG            |
| 8122202 | 1.95 | 0.000191 | MYB             |
| 8091715 | 2.07 | 0.000191 | LXN             |

### Supplemental Table 3

Overlap: transcripts differentially expressed following both SF-1 overexpression and knockdown in NCI-H295R adrenal cells

|                              | Transcript Cluster ID | SF-1 Overexpression |        | SF-1 Knockdown |        | Entrez Gene ID  | Gene Symbol                                     | Gene Title                                                                      | Gene locus |
|------------------------------|-----------------------|---------------------|--------|----------------|--------|-----------------|-------------------------------------------------|---------------------------------------------------------------------------------|------------|
|                              |                       | FC                  | adj.P  | FC             | adj.P  |                 |                                                 |                                                                                 |            |
| Positively regulated by SF-1 | 7990333               | 2.46                | 0.006  | -1.36          | 0.0264 | 1583            | <i>CYP11A1</i>                                  | cytochrome P450, family 11, subfamily A, polypeptide 1                          | 15q24.3    |
|                              | 8040430               | 2.2                 | 0.004  | -1.37          | 0.0197 | 7447            | <i>VSNL1</i>                                    | visinin-like 1                                                                  | 2p24.2     |
|                              | 8150253               | 2.03                | 0.0049 | -1.49          | 0.0197 | 6770            | <i>STAR</i>                                     | steroidogenic acute regulatory protein                                          | 8p12       |
|                              | 8039607               | 1.75                | 0.0045 | -1.28          | 0.0121 | 23619           | <i>ZIM2</i>                                     | zinc finger, imprinted 2                                                        | 19q13.33   |
|                              | 8039607               | 1.75                | 0.0045 | -1.28          | 0.0121 | 5178            | <i>PEG3</i>                                     | paternally expressed 3                                                          | 19q13.33   |
|                              | 7907702               | 1.61                | 0.0114 | -1.35          | 0.047  | 6646            | <i>SOAT1</i>                                    | sterol O-acyltransferase 1                                                      | 1q25.3     |
|                              | 8152764               | 1.35                | 0.0362 | -1.25          | 0.0264 | 9788            | <i>MTSS1</i>                                    | metastasis suppressor 1                                                         | 8q24.13    |
| Negatively regulated by SF-1 | 7962000               | -1.36               | 0.0498 | 1.43           | 0.0361 | 5744            | <i>PTH1H</i>                                    | parathyroid hormone-like hormone                                                | 12p11.22   |
|                              | 8161701               | -1.37               | 0.0299 | 1.26           | 0.0454 | 23670           | <i>TMEM2</i>                                    | transmembrane protein 2                                                         | 9q21.13    |
|                              | 8156610               | -1.38               | 0.0382 | 1.28           | 0.0218 | 22927           | <i>HABP4</i>                                    | hyaluronan binding protein 4                                                    | 9q22.33    |
|                              | 8156610               | -1.38               | 0.0382 | 1.28           | 0.0218 | 8555            | <i>CDC14B</i>                                   | CDC14 cell division cycle 14 homolog B ( <i>S. cerevisiae</i> )                 | 9q22.33    |
|                              | 8102800               | -1.56               | 0.0119 | 1.29           | 0.0124 | 23657           | <i>SLC7A11</i>                                  | solute carrier family 7, (cationic amino acid transporter, y+ system) member 11 | 4q28.3     |
|                              | 7943760               | -1.63               | 0.006  | 1.31           | 0.0437 | 23235           | <i>SIK2</i>                                     | salt-inducible kinase 2                                                         | 11q23.1    |
|                              | 7983527               | -1.85               | 0.0024 | 1.32           | 0.0264 | 80031           | <i>SEMA6D</i>                                   | sema domain, transmembrane domain (TM), and cytoplasmic domain, (semaphorin) 6D | 15q21.2    |
|                              | 8102415               | -1.86               | 0.0179 | 1.6            | 0.0075 | 817             | <i>CAMK2D</i>                                   | calcium/calmodulin-dependent protein kinase II delta                            | 4q26       |
|                              | 8168472               | -2                  | 0.0041 | 1.25           | 0.0317 | 538             | <i>ATP7A</i>                                    | ATPase, Cu <sup>++</sup> transporting, alpha polypeptide                        | Xq21.1     |
|                              | 8122807               | -2.01               | 0.0035 | 1.52           | 0.0357 | 9590            | <i>AKAP12</i>                                   | A kinase (PRKA) anchor protein 12                                               | 6q25.1     |
|                              | 7968015               | -2.1                | 0.0118 | 1.25           | 0.0405 | 55504           | <i>TNFRSF19</i>                                 | tumor necrosis factor receptor superfamily, member 19                           | 13q12.12   |
|                              | 8155849               | -2.33               | 0.0061 | 1.3            | 0.0258 | 301             | <i>ANXA1</i>                                    | annexin A1                                                                      | 9q21.13    |
|                              | 8163637               | -5.54               | 3E-05  | 1.47           | 0.0176 | 3371            | <i>TNC</i>                                      | tenascin C                                                                      | 9q33.1     |
|                              | 7909789               | -5.82               | 3E-05  | 1.54           | 0.0084 | 7042            | <i>TGFB2</i>                                    | transforming growth factor, beta 2                                              | 1q41       |
| 8166593                      | -5.86                 | 0.0001              | 1.37   | 0.0218         | 11141  | <i>IL1RAPL1</i> | interleukin 1 receptor accessory protein-like 1 | Xp21.3-p21.2                                                                    |            |

Transcript cluster IDs from Affymetrix for GeneChip Human Gene 1.0ST arrays

FC, fold change; adj.P, Benjamini-Hochberg-corrected P-value

## Supplemental Table 4

Characteristics of genes positively regulated by SF-1

| Gene Symbol    | Adrenal expression         |             | Selected Gene Ontology annotation: biological processes (evidence)                    | MIM: morbidity                        | Mouse model / Adrenal phenotype |
|----------------|----------------------------|-------------|---------------------------------------------------------------------------------------|---------------------------------------|---------------------------------|
|                | eGenetics (fetal to adult) | GNF (fetal) |                                                                                       |                                       |                                 |
| <i>CYP11A1</i> | Y                          | Y           | C21-steroid hormone biosynthetic process (IDA)                                        | Congenital Adrenal Insufficiency      | Y / Y                           |
| <i>VSNL1</i>   | Y                          | Y           | <i>calcium-mediated signaling; CNS development (in rat; TAS)</i>                      |                                       | N                               |
| <i>STAR</i>    | Y                          |             | Regulation of steroid biosynthetic process (IEA)                                      | Lipoid Congenital Adrenal Hyperplasia | Y / Y                           |
| <i>ZIM2</i>    | Y                          |             | DNA-dependent regulation of transcription (NAS)                                       |                                       | N                               |
| <i>PEG3</i>    | Y                          |             | DNA-dependent regulation of transcription (NAS)                                       |                                       | Y / N                           |
| <i>SOAT1</i>   |                            |             | Cholesterol esterification, cholesterol metabolic process (IDA)                       |                                       | Y / Y                           |
| <i>MTSS1</i>   | Y                          | Y           | Actin cytoskeleton organization (TAS), cell adhesion (NAS), signal transduction (IEA) |                                       | Y / N                           |

Adrenal expression was investigated through BioMart ([www.biomart.org](http://www.biomart.org)) based on two publicly available datasets, eGenetics (Kelso et al., *Genome Res* 2003;13:1222-30) and GNF (Su et al., *Proc Natl Acad Sci U S A* 2002;99:4465-70).

Gene ontology annotation was gathered at AmiGO ([www.geneontology.org](http://www.geneontology.org)). Evidence codes: IDA, Inferred from direct assay; TAS, Traceable author statement; IEA, Inferred from electronic annotation; NAS, Non-traceable author statement.

Human morbidity was investigated through OMIM (NCBI Entrez portal) and mouse data through Mouse Genomic Informatics ([www.informatics.jax.org](http://www.informatics.jax.org)).

CNS: central nervous system; MIM: Mendelian Inheritance in Man.
